# Supplementary material for: The impact of cineole treatment timing on common cold duration and symptoms: Non-randomized exploratory clinical trial
Source: PubMed Central journal article supplement (PMC10795983; doi:10.1371/journal.pone.0296482), 2024-01-18
Supplement: pone.0296482.s001.pdf [file pone.0296482.s001.pdf]

S1 Table: GLM model 3 for WURSS-11 AUC

| Fixed factors                                        | AUC WURSS (imputed)      |                           |                          | Type 3 two-sided p-values |
|------------------------------------------------------|--------------------------|---------------------------|--------------------------|---------------------------|
|                                                      | Stratum 1:<br>≤ 12 hours | Stratum 2:<br>12-24 hours | Stratum 3:<br>> 24 hours |                           |
| LS mean (95% CI) <sup>a, c</sup>                     | 139.3 [113.3, 165.3]     | 180.5 [151.8, 209.2]      | 229.8 [202.0, 257.5]     |                           |
| Difference between LS means (95% CI) <sup>b, c</sup> | -90.5 [-119.4, -61.6]    | -49.3 [-80.5, -18.0]      | N/A                      |                           |
| Type 3 effects <sup>a</sup>                          |                          |                           |                          |                           |
| Time to treatment stratum                            |                          |                           |                          | <.0001                    |
| Previous influenza vaccination                       |                          |                           |                          | 0.0008                    |
| Alcohol consumption (cat.)                           |                          |                           |                          | <.0001                    |
| Working status                                       |                          |                           |                          | 0.0085                    |
| Baseline WURSS (cat.)                                |                          |                           |                          | <.0001                    |

<sup>a</sup> Model contains time-to-treatment strata, baseline total symptom score, vaccination status, working status, alcohol consumption.

<sup>a</sup> Non-overlapping confidence intervals of LS-Means between 2 Strata indicate a significant difference between strata.  
Generalized linear model used inverse probability weights derived from propensity scoring approach.

<sup>b</sup> Compared with initiation of therapy at > 24 hours after start of illness.

<sup>b</sup> If 0 is outside the confidence interval for the differences between LS-Means then this comparison is significant.

<sup>c</sup> N/A: not applicable, CI: confidence interval.
