# Supplementary material for: The impact of cineole treatment timing on common cold duration and symptoms: Non-randomized exploratory clinical trial
Source: PubMed Central journal article supplement (PMC10795983; doi:10.1371/journal.pone.0296482), 2024-01-18
Supplement: pone.0296482.s002.pdf [file pone.0296482.s002.pdf]

S2 Table: GLM model 1 for WURSS-11 AUC (without imputation)

| Fixed factors                                        |                                | AUC WURSS (not imputed)  |                           |                          | Type 3 two-sided p-values |
|------------------------------------------------------|--------------------------------|--------------------------|---------------------------|--------------------------|---------------------------|
|                                                      |                                | Stratum 1:<br>≤ 12 hours | Stratum 2:<br>12-24 hours | Stratum 3:<br>> 24 hours |                           |
| LS mean (95% CI) <sup>a, c</sup>                     |                                | 119.7 [98.6, 140.9]      | 164.0 [139.8, 188.2]      | 232.4 [208.6, 256.1]     |                           |
| Difference between LS means (95% CI) <sup>b, c</sup> |                                | -112.6 [-141.0, -84.3]   | -68.4 [-98.9, -37.9]      | N/A                      |                           |
| Type 3 effects <sup>a</sup>                          | Time to treatment stratum      |                          |                           |                          | <.0001                    |
|                                                      | Age                            |                          |                           |                          | 0.9898                    |
|                                                      | Sex                            |                          |                           |                          | 0.9170                    |
|                                                      | Previous influenza vaccination |                          |                           |                          | 0.0125                    |
|                                                      | Baseline WURSS Score           |                          |                           |                          | <.0001                    |

<sup>a</sup> Model contains time-to-treatment strata, baseline total symptom score, sex, age, vaccination status.

<sup>a</sup> Non-overlapping confidence intervals of LS-Means between 2 Strata indicate a significant difference between strata.

<sup>b</sup> Compared with initiation of therapy at > 24 hours after start of illness.

<sup>b</sup> If 0 is outside the confidence interval for the differences between LS-Means then this comparison is significant.

<sup>c</sup> N/A: not applicable, CI: confidence interval.
