# Supplementary material for: The impact of cineole treatment timing on common cold duration and symptoms: Non-randomized exploratory clinical trial
Source: PubMed Central journal article supplement (PMC10795983; doi:10.1371/journal.pone.0296482), 2024-01-18
Supplement: pone.0296482.s003.pdf [file pone.0296482.s003.pdf]

S3 Table: MMRM model 2 for WURSS-11 mean daily symptom score

| Effect                         | Symptom Day | LS-Means | 95% CI         | p-value |
|--------------------------------|-------------|----------|----------------|---------|
| Alcohol consumption (cat.)     | .           | .        | .              | 0.3568  |
| Baseline WURSS (cat.)          | .           | .        | .              | <.0001  |
| Previous influenza vaccination | .           | .        | .              | 0.0818  |
| Working status                 | .           | .        | .              | 0.4303  |
| Stratum <= 12 hours            | 1           | 21.59    | [20.08, 23.09] |         |
|                                | 2           | 19.06    | [17.53, 20.59] |         |
|                                | 3           | 15.69    | [14.10, 17.28] |         |
|                                | 4           | 12.90    | [11.26, 14.54] |         |
|                                | 5           | 10.28    | [8.62, 11.94]  |         |
|                                | 6           | 8.02     | [6.33, 9.71]   |         |
|                                | 7           | 6.05     | [4.36, 7.74]   |         |
|                                | 8           | 4.57     | [2.94, 6.20]   |         |
|                                | 9           | 3.34     | [1.81, 4.87]   |         |
|                                | 10          | 2.70     | [1.26, 4.14]   |         |
|                                | 11          | 2.06     | [0.76, 3.36]   |         |
|                                | 12          | 1.23     | [0.09, 2.37]   |         |
|                                | 13          | 0.84     | [0.00, 1.90]   |         |
|                                | 14          | 0.53     | [0.00, 1.47]   |         |
|                                | 15          | 0.26     | [0.00, 1.13]   |         |
|                                | 16          | 0.14     | [0.00, 0.94]   |         |
|                                | 17          | 0.09     | [0.00, 0.90]   |         |
| Stratum 12-24 hours            | 1           | 22.95    | [21.19, 24.71] |         |
|                                | 2           | 22.28    | [20.49, 24.07] |         |
|                                | 3           | 20.42    | [18.56, 22.29] |         |
|                                | 4           | 18.01    | [16.09, 19.94] |         |
|                                | 5           | 15.03    | [13.08, 16.97] |         |
|                                | 6           | 11.96    | [9.98, 13.94]  |         |
|                                | 7           | 9.26     | [7.28, 11.24]  |         |
|                                | 8           | 7.38     | [5.47, 9.29]   |         |
|                                | 9           | 5.45     | [3.65, 7.25]   |         |
|                                | 10          | 4.25     | [2.57, 5.94]   |         |
|                                | 11          | 2.68     | [1.16, 4.19]   |         |
|                                | 12          | 1.88     | [0.56, 3.21]   |         |
|                                | 13          | 1.38     | [0.15, 2.62]   |         |
|                                | 14          | 0.82     | [0.00, 1.90]   |         |
|                                | 15          | 0.36     | [0.00, 1.36]   |         |
|                                | 16          | 0.25     | [0.00, 1.17]   |         |
|                                | 17          | 0.15     | [0.00, 1.08]   |         |

| Effect                                       | Symptom Day | LS-Means | 95% CI          | p-value  |
|----------------------------------------------|-------------|----------|-----------------|----------|
| Stratum >24 hours                            | 1           | 22.43    | [20.75, 24.11]  |          |
|                                              | 2           | 23.78    | [22.08, 25.49]  |          |
|                                              | 3           | 23.03    | [21.25, 24.81]  |          |
|                                              | 4           | 21.47    | [19.64, 23.30]  |          |
|                                              | 5           | 19.27    | [17.41, 21.12]  |          |
|                                              | 6           | 16.22    | [14.34, 18.11]  |          |
|                                              | 7           | 13.95    | [12.06, 15.84]  |          |
|                                              | 8           | 11.04    | [9.22, 12.86]   |          |
|                                              | 9           | 8.57     | [6.85, 10.28]   |          |
|                                              | 10          | 6.80     | [5.19, 8.41]    |          |
|                                              | 11          | 5.57     | [4.12, 7.02]    |          |
|                                              | 12          | 4.02     | [2.74, 5.29]    |          |
|                                              | 13          | 3.34     | [2.15, 4.53]    |          |
|                                              | 14          | 2.22     | [1.17, 3.27]    |          |
|                                              | 15          | 1.50     | [0.53, 2.47]    |          |
|                                              | 16          | 1.07     | [0.17, 1.96]    |          |
|                                              | 17          | 1.03     | [0.13, 1.93]    |          |
| Stratum <= 12 hours -<br>Stratum 12-24 hours | 1           | -1.36    | [-3.56, 0.84]   | 0.2238   |
|                                              | 2           | -3.22    | [-5.46, -0.98]  | 0.0050 * |
|                                              | 3           | -4.73    | [-7.08, -2.38]  | <.0001 * |
|                                              | 4           | -5.12    | [-7.54, -2.69]  | <.0001 * |
|                                              | 5           | -4.75    | [-7.20, -2.29]  | 0.0002 * |
|                                              | 6           | -3.94    | [-6.44, -1.43]  | 0.0022 * |
|                                              | 7           | -3.21    | [-5.72, -0.70]  | 0.0123 * |
|                                              | 8           | -2.81    | [-5.22, -0.40]  | 0.0224 * |
|                                              | 9           | -2.11    | [-4.37, 0.14]   | 0.0662   |
|                                              | 10          | -1.56    | [-3.66, 0.55]   | 0.1464   |
|                                              | 11          | -0.62    | [-2.48, 1.25]   | 0.5148   |
|                                              | 12          | -0.65    | [-2.25, 0.94]   | 0.4198   |
|                                              | 13          | -0.54    | [-2.01, 0.93]   | 0.4684   |
|                                              | 14          | -0.28    | [-1.53, 0.96]   | 0.6544   |
|                                              | 15          | -0.09    | [-1.21, 1.02]   | 0.8706   |
|                                              | 16          | -0.11    | [-1.10, 0.88]   | 0.8314   |
|                                              | 17          | -0.06    | [-1.06, 0.94]   | 0.9067   |
| Stratum <= 12 hours -<br>Stratum >24 hours   | 1           | -0.84    | [-2.98, 1.29]   | 0.4376   |
|                                              | 2           | -4.72    | [-6.90, -2.54]  | <.0001 * |
|                                              | 3           | -7.34    | [-9.62, -5.05]  | <.0001 * |
|                                              | 4           | -8.57    | [-10.93, -6.22] | <.0001 * |
|                                              | 5           | -8.99    | [-11.37, -6.60] | <.0001 * |
|                                              | 6           | -8.20    | [-10.64, -5.77] | <.0001 * |
|                                              | 7           | -7.90    | [-10.34, -5.47] | <.0001 * |
|                                              | 8           | -6.47    | [-8.81, -4.13]  | <.0001 * |
|                                              | 9           | -5.23    | [-7.42, -3.04]  | <.0001 * |
|                                              | 10          | -4.10    | [-6.14, -2.06]  | <.0001 * |
|                                              | 11          | -3.51    | [-5.32, -1.70]  | 0.0002 * |
|                                              | 12          | -2.79    | [-4.34, -1.23]  | 0.0005 * |
|                                              | 13          | -2.49    | [-3.92, -1.07]  | 0.0007 * |
|                                              | 14          | -1.68    | [-2.90, -0.47]  | 0.0067 * |
|                                              | 15          | -1.24    | [-2.33, -0.15]  | 0.0264 * |
|                                              | 16          | -0.92    | [-1.89, 0.05]   | 0.0619   |
|                                              | 17          | -0.94    | [-1.91, 0.04]   | 0.0603   |

| Effect                                     | Symptom Day | LS-Means | 95% CI         | p-value  |
|--------------------------------------------|-------------|----------|----------------|----------|
| Stratum 12-24 hours -<br>Stratum >24 hours | 1           | 0.52     | [-1.80, 2.83]  | 0.6597   |
|                                            | 2           | -1.50    | [-3.86, 0.86]  | 0.2113   |
|                                            | 3           | -2.60    | [-5.07, -0.13] | 0.0390 * |
|                                            | 4           | -3.46    | [-6.01, -0.90] | 0.0081 * |
|                                            | 5           | -4.24    | [-6.83, -1.65] | 0.0014 * |
|                                            | 6           | -4.27    | [-6.90, -1.63] | 0.0016 * |
|                                            | 7           | -4.69    | [-7.33, -2.05] | 0.0005 * |
|                                            | 8           | -3.66    | [-6.20, -1.13] | 0.0047 * |
|                                            | 9           | -3.12    | [-5.49, -0.74] | 0.0102 * |
|                                            | 10          | -2.54    | [-4.76, -0.33] | 0.0244 * |
|                                            | 11          | -2.89    | [-4.86, -0.93] | 0.0040 * |
|                                            | 12          | -2.13    | [-3.81, -0.45] | 0.0132 * |
|                                            | 13          | -1.95    | [-3.50, -0.41] | 0.0135 * |
|                                            | 14          | -1.40    | [-2.72, -0.08] | 0.0371 * |
|                                            | 15          | -1.14    | [-2.33, 0.04]  | 0.0582   |
|                                            | 16          | -0.82    | [-1.87, 0.24]  | 0.1284   |
|                                            | 17          | -0.88    | [-1.94, 0.18]  | 0.1050   |

° If lower limit of 95% confidence interval of LSMEANS is below 0 then this value is set to 0. \* = significant difference between LSMEANS.
