# Supplementary material for: The impact of cineole treatment timing on common cold duration and symptoms: Non-randomized exploratory clinical trial
Source: PubMed Central journal article supplement (PMC10795983; doi:10.1371/journal.pone.0296482), 2024-01-18
Supplement: pone.0296482.s005.pdf [file pone.0296482.s005.pdf]

S5 Table: MMRM model 1 for WURSS-11 mean daily symptom score (without imputation)

| Effect                         | Symptom Day | LS-Means | 95% CI         | p-value |
|--------------------------------|-------------|----------|----------------|---------|
| Age                            | .           | .        |                | 0.5607  |
| Baseline symptom score         | .           | .        |                | <.0001  |
| Previous influenza vaccination | .           | .        |                | 0.2914  |
| Sex                            | .           | .        |                | 0.0613  |
| Stratum <= 12 hours            | 1           | 21.81    | [20.56, 23.05] |         |
|                                | 2           | 19.28    | [17.94, 20.62] |         |
|                                | 3           | 15.94    | [14.49, 17.38] |         |
|                                | 4           | 13.12    | [11.59, 14.64] |         |
|                                | 5           | 10.51    | [8.96, 12.06]  |         |
|                                | 6           | 8.24     | [6.65, 9.83]   |         |
|                                | 7           | 6.25     | [4.64, 7.85]   |         |
|                                | 8           | 4.80     | [3.26, 6.35]   |         |
|                                | 9           | 3.56     | [2.10, 5.01]   |         |
|                                | 10          | 2.91     | [1.54, 4.27]   |         |
|                                | 11          | 2.27     | [1.04, 3.50]   |         |
|                                | 12          | 1.43     | [0.36, 2.51]   |         |
|                                | 13          | 1.01     | [0.00, 2.02]   |         |
|                                | 14          | 0.65     | [0.00, 1.54]   |         |
|                                | 15          | 0.40     | [0.00, 1.23]   |         |
|                                | 16          | 0.16     | [0.00, 0.90]   |         |
|                                | 17          | 0.17     | [0.00, 0.91]   |         |
| Stratum 12-24 hours            | 1           | 23.10    | [21.63, 24.56] |         |
|                                | 2           | 22.43    | [20.86, 24.00] |         |
|                                | 3           | 20.57    | [18.87, 22.26] |         |
|                                | 4           | 18.18    | [16.39, 19.97] |         |
|                                | 5           | 15.17    | [13.35, 16.99] |         |
|                                | 6           | 12.04    | [10.18, 13.90] |         |
|                                | 7           | 9.40     | [7.52, 11.28]  |         |
|                                | 8           | 7.52     | [5.71, 9.34]   |         |
|                                | 9           | 5.60     | [3.89, 7.30]   |         |
|                                | 10          | 4.41     | [2.82, 6.01]   |         |
|                                | 11          | 2.77     | [1.34, 4.20]   |         |
|                                | 12          | 1.92     | [0.67, 3.16]   |         |
|                                | 13          | 1.44     | [0.28, 2.61]   |         |
|                                | 14          | 0.87     | [0.00, 1.89]   |         |
|                                | 15          | 0.33     | [0.00, 1.28]   |         |
|                                | 16          | 0.00     | [0.00, 0.83]   |         |
|                                | 17          | 0.00     | [0.00, 0.78]   |         |

| Effect                                       | Symptom Day | LS-Means | 95% CI          | p-value  |
|----------------------------------------------|-------------|----------|-----------------|----------|
| Stratum >24 hours                            | 1           | 22.73    | [21.33, 24.13]  |          |
|                                              | 2           | 24.16    | [22.66, 25.66]  |          |
|                                              | 3           | 23.40    | [21.78, 25.02]  |          |
|                                              | 4           | 21.87    | [20.17, 23.58]  |          |
|                                              | 5           | 19.64    | [17.91, 21.37]  |          |
|                                              | 6           | 16.60    | [14.83, 18.37]  |          |
|                                              | 7           | 14.32    | [12.53, 16.11]  |          |
|                                              | 8           | 11.41    | [9.68, 13.14]   |          |
|                                              | 9           | 8.94     | [7.32, 10.56]   |          |
|                                              | 10          | 7.17     | [5.65, 8.69]    |          |
|                                              | 11          | 5.95     | [4.59, 7.32]    |          |
|                                              | 12          | 4.38     | [3.19, 5.58]    |          |
|                                              | 13          | 3.70     | [2.58, 4.83]    |          |
|                                              | 14          | 2.58     | [1.59, 3.57]    |          |
|                                              | 15          | 1.85     | [0.93, 2.77]    |          |
|                                              | 16          | 1.31     | [0.49, 2.13]    |          |
|                                              | 17          | 1.30     | [0.47, 2.12]    |          |
| Stratum <= 12 hours -<br>Stratum 12-24 hours | 1           | -1.29    | [-3.18, 0.60]   | 0.1808   |
|                                              | 2           | -3.15    | [-5.18, -1.11]  | 0.0026 * |
|                                              | 3           | -4.63    | [-6.83, -2.43]  | <.0001 * |
|                                              | 4           | -5.06    | [-7.39, -2.73]  | <.0001 * |
|                                              | 5           | -4.66    | [-7.03, -2.30]  | 0.0001 * |
|                                              | 6           | -3.80    | [-6.22, -1.38]  | 0.0022 * |
|                                              | 7           | -3.16    | [-5.60, -0.71]  | 0.0116 * |
|                                              | 8           | -2.72    | [-5.08, -0.36]  | 0.0241 * |
|                                              | 9           | -2.04    | [-4.25, 0.17]   | 0.0707   |
|                                              | 10          | -1.50    | [-3.58, 0.57]   | 0.1544   |
|                                              | 11          | -0.50    | [-2.35, 1.35]   | 0.5970   |
|                                              | 12          | -0.48    | [-2.10, 1.13]   | 0.5541   |
|                                              | 13          | -0.44    | [-1.94, 1.07]   | 0.5677   |
|                                              | 14          | -0.22    | [-1.53, 1.09]   | 0.7429   |
|                                              | 15          | 0.07     | [-1.14, 1.29]   | 0.9072   |
|                                              | 16          | 0.18     | [-0.89, 1.25]   | 0.7366   |
|                                              | 17          | 0.24     | [-0.84, 1.32]   | 0.6631   |
| Stratum <= 12 hours -<br>Stratum >24 hours   | 1           | -0.93    | [-2.77, 0.91]   | 0.3211   |
|                                              | 2           | -4.87    | [-6.85, -2.90]  | <.0001 * |
|                                              | 3           | -7.46    | [-9.60, -5.33]  | <.0001 * |
|                                              | 4           | -8.76    | [-11.02, -6.50] | <.0001 * |
|                                              | 5           | -9.13    | [-11.43, -6.84] | <.0001 * |
|                                              | 6           | -8.36    | [-10.71, -6.01] | <.0001 * |
|                                              | 7           | -8.08    | [-10.45, -5.70] | <.0001 * |
|                                              | 8           | -6.61    | [-8.90, -4.32]  | <.0001 * |
|                                              | 9           | -5.38    | [-7.53, -3.23]  | <.0001 * |
|                                              | 10          | -4.26    | [-6.27, -2.25]  | <.0001 * |
|                                              | 11          | -3.89    | [-5.48, -1.89]  | <.0001 * |
|                                              | 12          | -2.95    | [-4.52, -1.39]  | 0.0002 * |
|                                              | 13          | -2.70    | [-4.16, -1.24]  | 0.0003 * |
|                                              | 14          | -1.93    | [-3.21, -0.66]  | 0.0031 * |
|                                              | 15          | -1.45    | [-2.63, -0.27]  | 0.0160 * |
|                                              | 16          | -1.15    | [-2.19, -0.11]  | 0.0304 * |
|                                              | 17          | -1.13    | [-2.18, -0.08]  | 0.0344 * |

| Effect                                     | Symptom Day | LS-Means | 95% CI         | p-value  |
|--------------------------------------------|-------------|----------|----------------|----------|
| Stratum 12-24 hours -<br>Stratum >24 hours | 1           | 0.36     | [-1.63, 2.35]  | 0.7206   |
|                                            | 2           | -1.73    | [-3.87, 0.41]  | 0.1124   |
|                                            | 3           | -2.83    | [-5.14, -0.52] | 0.0166 * |
|                                            | 4           | -3.69    | [-6.14, -1.25] | 0.0032 * |
|                                            | 5           | -4.47    | [-6.95, -1.99] | 0.0005 * |
|                                            | 6           | -4.56    | [-7.10, -2.02] | 0.0005 * |
|                                            | 7           | -4.92    | [-7.49, -2.35] | 0.0002 * |
|                                            | 8           | -3.89    | [-6.37, -1.41] | 0.0022 * |
|                                            | 9           | -3.34    | [-5.66, -1.02] | 0.0049 * |
|                                            | 10          | -2.76    | [-4.93, -0.58] | 0.0131 * |
|                                            | 11          | -3.19    | [-5.13, -1.25] | 0.0014 * |
|                                            | 12          | -2.47    | [-4.16, -0.78] | 0.0043 * |
|                                            | 13          | -2.26    | [-3.83, -0.68] | 0.0051 * |
|                                            | 14          | -1.71    | [-3.09, -0.34] | 0.0147 * |
|                                            | 15          | -1.52    | [-2.79, -0.26] | 0.0185 * |
|                                            | 16          | -1.33    | [-2.45, -0.22] | 0.0197 * |
|                                            | 17          | -1.37    | [-2.50, -0.25] | 0.0173 * |

° If lower limit of 95% confidence interval of LSMEANS is below 0 then this value is set to 0. \* = significant difference between LSMEANS.
