# Supplementary material for: The impact of cineole treatment timing on common cold duration and symptoms: Non-randomized exploratory clinical trial
Source: PubMed Central journal article supplement (PMC10795983; doi:10.1371/journal.pone.0296482), 2024-01-18
Supplement: pone.0296482.s006.pdf [file pone.0296482.s006.pdf]

S6 Table: MMRM model 1 for WURSS-11 mean daily QoL score (without imputation)

| Effect              | Symptom Day | LS-Means | 95% CI       | p-value |
|---------------------|-------------|----------|--------------|---------|
| Baseline QoL score  | .           | .        |              | <.0001  |
| Stratum <= 12 hours | 1           | 6.15     | [5.61, 6.68] |         |
|                     | 2           | 5.86     | [5.34, 6.38] |         |
|                     | 3           | 4.84     | [4.28, 5.40] |         |
|                     | 4           | 3.95     | [3.38, 4.52] |         |
|                     | 5           | 3.20     | [2.65, 3.76] |         |
|                     | 6           | 2.51     | [1.98, 3.05] |         |
|                     | 7           | 2.03     | [1.49, 2.57] |         |
|                     | 8           | 1.60     | [1.08, 2.12] |         |
|                     | 9           | 1.13     | [0.65, 1.62] |         |
|                     | 10          | 0.98     | [0.51, 1.44] |         |
|                     | 11          | 0.76     | [0.37, 1.14] |         |
|                     | 12          | 0.44     | [0.11, 0.77] |         |
|                     | 13          | 0.32     | [0.03, 0.61] |         |
|                     | 14          | 0.24     | [0.00, 0.48] |         |
|                     | 15          | 0.15     | [0.00, 0.38] |         |
|                     | 16          | 0.13     | [0.00, 0.34] |         |
|                     | 17          | 0.10     | [0.00, 0.27] |         |
| Stratum 12-24 hours | 1           | 6.07     | [5.44, 6.70] |         |
|                     | 2           | 6.46     | [5.85, 7.07] |         |
|                     | 3           | 6.06     | [5.40, 6.72] |         |
|                     | 4           | 5.30     | [4.63, 5.97] |         |
|                     | 5           | 4.45     | [3.80, 5.11] |         |
|                     | 6           | 3.59     | [2.96, 4.22] |         |
|                     | 7           | 2.69     | [2.05, 3.32] |         |
|                     | 8           | 2.17     | [1.56, 2.78] |         |
|                     | 9           | 1.57     | [1.00, 2.14] |         |
|                     | 10          | 1.23     | [0.69, 1.77] |         |
|                     | 11          | 0.76     | [0.31, 1.22] |         |
|                     | 12          | 0.47     | [0.09, 0.86] |         |
|                     | 13          | 0.34     | [0.00, 0.68] |         |
|                     | 14          | 0.23     | [0.00, 0.51] |         |
|                     | 15          | 0.12     | [0.00, 0.39] |         |
|                     | 16          | 0.10     | [0.00, 0.34] |         |
|                     | 17          | 0.07     | [0.00, 0.26] |         |

| Effect                                       | Symptom Day | LS-Means | 95% CI         | p-value  |
|----------------------------------------------|-------------|----------|----------------|----------|
| Stratum >24 hours                            | 1           | 6.22     | [5.63, 6.82]   |          |
|                                              | 2           | 6.73     | [6.15, 7.31]   |          |
|                                              | 3           | 6.68     | [6.05, 7.30]   |          |
|                                              | 4           | 6.25     | [5.62, 6.89]   |          |
|                                              | 5           | 5.55     | [4.93, 6.17]   |          |
|                                              | 6           | 4.70     | [4.10, 5.29]   |          |
|                                              | 7           | 4.16     | [3.56, 4.76]   |          |
|                                              | 8           | 3.33     | [2.75, 3.91]   |          |
|                                              | 9           | 2.72     | [2.18, 3.26]   |          |
|                                              | 10          | 2.31     | [1.80, 2.82]   |          |
|                                              | 11          | 1.85     | [1.42, 2.28]   |          |
|                                              | 12          | 1.48     | [1.11, 1.84]   |          |
|                                              | 13          | 1.22     | [0.90, 1.54]   |          |
|                                              | 14          | 0.85     | [0.59, 1.12]   |          |
|                                              | 15          | 0.63     | [0.38, 0.89]   |          |
|                                              | 16          | 0.45     | [0.22, 0.68]   |          |
|                                              | 17          | 0.34     | [0.16, 0.52]   |          |
| Stratum <= 12 hours -<br>Stratum 12-24 hours | 1           | 0.07     | [-0.75, 0.90]  | 0.8629   |
|                                              | 2           | -0.60    | [-1.40, 0.20]  | 0.1419   |
|                                              | 3           | -1.22    | [-2.09, -0.35] | 0.0059 * |
|                                              | 4           | -1.35    | [-2.23, -0.47] | 0.0027 * |
|                                              | 5           | -1.25    | [-2.11, -0.39] | 0.0044 * |
|                                              | 6           | -1.08    | [-1.90, -0.25] | 0.0106 * |
|                                              | 7           | -0.65    | [-1.49, 0.18]  | 0.1228   |
|                                              | 8           | -0.57    | [-1.37, 0.23]  | 0.1609   |
|                                              | 9           | -0.44    | [-1.19, 0.31]  | 0.2476   |
|                                              | 10          | -0.25    | [-0.97, 0.46]  | 0.4824   |
|                                              | 11          | -0.01    | [-0.61, 0.59]  | 0.9793   |
|                                              | 12          | -0.03    | [-0.54, 0.48]  | 0.9035   |
|                                              | 13          | -0.02    | [-0.46, 0.43]  | 0.9362   |
|                                              | 14          | 0.01     | [-0.36, 0.38]  | 0.9495   |
|                                              | 15          | 0.03     | [-0.33, 0.39]  | 0.8773   |
|                                              | 16          | 0.03     | [-0.29, 0.35]  | 0.8557   |
|                                              | 17          | 0.04     | [-0.22, 0.29]  | 0.7887   |
| Stratum <= 12 hours -<br>Stratum >24 hours   | 1           | -0.08    | [-0.88, 0.72]  | 0.8505   |
|                                              | 2           | -0.87    | [-1.65, -0.10] | 0.0279 * |
|                                              | 3           | -1.84    | [-2.68, -1.00] | <.0001 * |
|                                              | 4           | -2.30    | [-3.16, -1.45] | <.0001 * |
|                                              | 5           | -2.35    | [-3.18, -1.51] | <.0001 * |
|                                              | 6           | -2.19    | [-2.99, -1.39] | <.0001 * |
|                                              | 7           | -2.13    | [-2.94, -1.32] | <.0001 * |
|                                              | 8           | -1.73    | [-2.51, -0.96] | <.0001 * |
|                                              | 9           | -1.59    | [-2.32, -0.87] | <.0001 * |
|                                              | 10          | -1.33    | [-2.02, -0.64] | 0.0002 * |
|                                              | 11          | -1.10    | [-1.68, -0.52] | 0.0002 * |
|                                              | 12          | -1.04    | [-1.53, -0.54] | <.0001 * |
|                                              | 13          | -0.90    | [-1.33, -0.47] | <.0001 * |
|                                              | 14          | -0.61    | [-0.97, -0.25] | 0.0009 * |
|                                              | 15          | -0.48    | [-0.83, -0.14] | 0.0063 * |
|                                              | 16          | -0.33    | [-0.64, -0.02] | 0.0398 * |
|                                              | 17          | -0.24    | [-0.49, 0.01]  | 0.0584   |

| Effect                                     | Symptom Day | LS-Means | 95% CI         | p-value  |
|--------------------------------------------|-------------|----------|----------------|----------|
| Stratum 12-24 hours -<br>Stratum >24 hours | 1           | -0.15    | [-1.02, 0.72]  | 0.7354   |
|                                            | 2           | -0.27    | [-1.11, 0.57]  | 0.5238   |
|                                            | 3           | -0.62    | [-1.52, 0.29]  | 0.1832   |
|                                            | 4           | -0.95    | [-1.88, -0.03] | 0.0428 * |
|                                            | 5           | -1.10    | [-2.00, -0.20] | 0.0171 * |
|                                            | 6           | -1.11    | [-1.97, -0.24] | 0.0123 * |
|                                            | 7           | -1.48    | [-2.35, -0.60] | 0.0010 * |
|                                            | 8           | -1.16    | [-2.00, -0.32] | 0.0068 * |
|                                            | 9           | -1.15    | [-1.94, -0.37] | 0.0042 * |
|                                            | 10          | -1.08    | [-1.83, -0.33] | 0.0047 * |
|                                            | 11          | -1.09    | [-1.72, -0.46] | 0.0007 * |
|                                            | 12          | -1.01    | [-1.54, -0.47] | 0.0002 * |
|                                            | 13          | -0.88    | [-1.35, -0.42] | 0.0002 * |
|                                            | 14          | -0.63    | [-1.01, -0.24] | 0.0017 * |
|                                            | 15          | -0.51    | [-0.88, -0.14] | 0.0072 * |
|                                            | 16          | -0.36    | [-0.69, -0.02] | 0.0370 * |
|                                            | 17          | -0.27    | [-0.54, -0.01] | 0.0438 * |

° If lower limit of 95% confidence interval of LSMEANS is below 0 then this value is set to 0. \* = significant difference between LSMEANS.  
Model 1 did not converge. Therefore only baseline values were included into the model.
