# Supplementary material for: The impact of cineole treatment timing on common cold duration and symptoms: Non-randomized exploratory clinical trial
Source: PubMed Central journal article supplement (PMC10795983; doi:10.1371/journal.pone.0296482), 2024-01-18
Supplement: pone.0296482.s007.pdf [file pone.0296482.s007.pdf]

S7 Table: Occurrence of acute bronchitis during the trial

|                                     | Time to treatment stratum |      |                       |      |                 |      | Total<br>(N=308) |      |
|-------------------------------------|---------------------------|------|-----------------------|------|-----------------|------|------------------|------|
|                                     | ≤12 h<br>(N=122)          |      | >12 to 24 h<br>(N=88) |      | >24 h<br>(N=98) |      | n                | %    |
|                                     | n                         | %    | n                     | %    | n               | %    |                  |      |
| <b>Presence of acute bronchitis</b> |                           |      |                       |      |                 |      |                  |      |
| No <sup>1</sup>                     | 79                        | 64.8 | 53                    | 60.2 | 52              | 53.1 | 184              | 59.7 |
| Yes                                 | 40                        | 32.8 | 35                    | 39.8 | 45              | 45.9 | 120              | 39.0 |
| Unknown                             | 3                         | 2.5  | 0                     | 0    | 1               | 1.0  | 4                | 1.3  |
| <b>Severity of acute bronchitis</b> |                           |      |                       |      |                 |      |                  |      |
| Mild                                | 32                        | 26.2 | 28                    | 31.8 | 38              | 38.8 | 98               | 31.8 |
| Moderate                            | 7                         | 5.7  | 7                     | 8.0  | 6               | 6.1  | 20               | 6.5  |
| Severe                              | 1                         | 0.8  | 0                     | 0    | 1               | 1.0  | 2                | 0.6  |
