# Supplementary material for: The impact of cineole treatment timing on common cold duration and symptoms: Non-randomized exploratory clinical trial
Source: PubMed Central journal article supplement (PMC10795983; doi:10.1371/journal.pone.0296482), 2024-01-18
Supplement: pone.0296482.s008.pdf [file pone.0296482.s008.pdf]

S8 Table: WURSS-11 single items (descriptive statistics)

| 02 - Runny nose (daily mean)<br>(imputed) |                      | Stratum<br><= 12 hours<br>(N=122) | Stratum<br>12 - 24 hours<br>(N=88) | Stratum<br>> 24 hours<br>(N=98) | Total<br>(N=308) |
|-------------------------------------------|----------------------|-----------------------------------|------------------------------------|---------------------------------|------------------|
| <b>Symptom day</b>                        |                      |                                   |                                    |                                 |                  |
| <b>1</b>                                  | N <sub>valid</sub>   | 122                               | 86                                 | 96                              | 304              |
|                                           | N <sub>missing</sub> | 0                                 | 2                                  | 2                               | 4                |
|                                           | <b>Mean</b>          | 3.47                              | 3.15                               | 3.30                            | 3.32             |
|                                           | SD                   | 1.67                              | 1.85                               | 1.87                            | 1.78             |
|                                           | Minimum              | 0.0                               | 0.0                                | 0.0                             | 0.0              |
|                                           | Median               | 3.50                              | 3.50                               | 3.00                            | 3.50             |
|                                           | Maximum              | 7.0                               | 7.0                                | 7.0                             | 7.0              |
| <b>2</b>                                  | N <sub>valid</sub>   | 122                               | 88                                 | 98                              | 308              |
|                                           | N <sub>missing</sub> | 0                                 | 0                                  | 0                               | 0                |
|                                           | <b>Mean</b>          | 3.05                              | 3.13                               | 3.70                            | 3.28             |
|                                           | SD                   | 1.74                              | 1.69                               | 1.75                            | 1.75             |
|                                           | Minimum              | 0.0                               | 0.0                                | 0.0                             | 0.0              |
|                                           | Median               | 3.00                              | 3.50                               | 4.00                            | 3.50             |
|                                           | Maximum              | 7.0                               | 7.0                                | 7.0                             | 7.0              |
| <b>3</b>                                  | N <sub>valid</sub>   | 122                               | 88                                 | 98                              | 308              |
|                                           | N <sub>missing</sub> | 0                                 | 0                                  | 0                               | 0                |
|                                           | <b>Mean</b>          | 2.66                              | 3.04                               | 3.59                            | 3.07             |
|                                           | SD                   | 1.73                              | 1.75                               | 1.83                            | 1.81             |
|                                           | Minimum              | 0.0                               | 0.0                                | 0.0                             | 0.0              |
|                                           | Median               | 3.00                              | 3.50                               | 4.00                            | 3.50             |
|                                           | Maximum              | 7.0                               | 7.0                                | 7.0                             | 7.0              |

| 02 - Runny nose (daily mean)<br>(imputed) |                      | Stratum<br>≤ 12 hours<br>(N=122) | Stratum<br>12 - 24 hours<br>(N=88) | Stratum<br>> 24 hours<br>(N=98) | Total<br>(N=308) |
|-------------------------------------------|----------------------|----------------------------------|------------------------------------|---------------------------------|------------------|
| 4                                         | N <sub>valid</sub>   | 122                              | 88                                 | 98                              | 308              |
|                                           | N <sub>missing</sub> | 0                                | 0                                  | 0                               | 0                |
|                                           | <b>Mean</b>          | 2.15                             | 2.82                               | 3.28                            | 2.70             |
|                                           | SD                   | 1.63                             | 1.88                               | 1.80                            | 1.82             |
|                                           | Minimum              | 0.0                              | 0.0                                | 0.0                             | 0.0              |
|                                           | Median               | 2.00                             | 3.00                               | 3.50                            | 3.00             |
|                                           | Maximum              | 7.0                              | 7.0                                | 6.0                             | 7.0              |
| 5                                         | N <sub>valid</sub>   | 122                              | 88                                 | 98                              | 308              |
|                                           | N <sub>missing</sub> | 0                                | 0                                  | 0                               | 0                |
|                                           | <b>Mean</b>          | 1.69                             | 2.35                               | 2.99                            | 2.29             |
|                                           | SD                   | 1.46                             | 1.71                               | 1.84                            | 1.74             |
|                                           | Minimum              | 0.0                              | 0.0                                | 0.0                             | 0.0              |
|                                           | Median               | 1.50                             | 2.00                               | 3.00                            | 2.00             |
|                                           | Maximum              | 6.0                              | 6.5                                | 6.0                             | 6.5              |
| 6                                         | N <sub>valid</sub>   | 122                              | 88                                 | 98                              | 308              |
|                                           | N <sub>missing</sub> | 0                                | 0                                  | 0                               | 0                |
|                                           | <b>Mean</b>          | 1.31                             | 1.98                               | 2.50                            | 1.88             |
|                                           | SD                   | 1.34                             | 1.56                               | 1.84                            | 1.65             |
|                                           | Minimum              | 0.0                              | 0.0                                | 0.0                             | 0.0              |
|                                           | Median               | 1.00                             | 2.00                               | 2.50                            | 1.50             |
|                                           | Maximum              | 7.0                              | 5.0                                | 6.0                             | 7.0              |
| 7                                         | N <sub>valid</sub>   | 122                              | 88                                 | 98                              | 308              |
|                                           | N <sub>missing</sub> | 0                                | 0                                  | 0                               | 0                |
|                                           | <b>Mean</b>          | 1.00                             | 1.56                               | 2.06                            | 1.49             |
|                                           | SD                   | 1.30                             | 1.55                               | 1.84                            | 1.62             |
|                                           | Minimum              | 0.0                              | 0.0                                | 0.0                             | 0.0              |
|                                           | Median               | 0.50                             | 1.00                               | 2.00                            | 1.00             |
|                                           | Maximum              | 5.0                              | 5.0                                | 6.0                             | 6.0              |
| 8                                         | N <sub>valid</sub>   | 122                              | 88                                 | 98                              | 308              |
|                                           | N <sub>missing</sub> | 0                                | 0                                  | 0                               | 0                |
|                                           | <b>Mean</b>          | 0.73                             | 1.23                               | 1.70                            | 1.18             |
|                                           | SD                   | 1.18                             | 1.48                               | 1.71                            | 1.50             |
|                                           | Minimum              | 0.0                              | 0.0                                | 0.0                             | 0.0              |
|                                           | Median               | 0.00                             | 0.75                               | 1.00                            | 0.50             |
|                                           | Maximum              | 5.0                              | 5.0                                | 6.0                             | 6.0              |
| 9                                         | N <sub>valid</sub>   | 122                              | 88                                 | 98                              | 308              |
|                                           | N <sub>missing</sub> | 0                                | 0                                  | 0                               | 0                |
|                                           | <b>Mean</b>          | 0.55                             | 0.89                               | 1.36                            | 0.91             |
|                                           | SD                   | 1.02                             | 1.39                               | 1.63                            | 1.38             |
|                                           | Minimum              | 0.0                              | 0.0                                | 0.0                             | 0.0              |
|                                           | Median               | 0.00                             | 0.00                               | 1.00                            | 0.00             |
|                                           | Maximum              | 3.5                              | 5.0                                | 6.0                             | 6.0              |
| 10                                        | N <sub>valid</sub>   | 122                              | 88                                 | 98                              | 308              |
|                                           | N <sub>missing</sub> | 0                                | 0                                  | 0                               | 0                |
|                                           | <b>Mean</b>          | 0.44                             | 0.70                               | 1.13                            | 0.74             |
|                                           | SD                   | 0.90                             | 1.21                               | 1.54                            | 1.25             |
|                                           | Minimum              | 0.0                              | 0.0                                | 0.0                             | 0.0              |
|                                           | Median               | 0.00                             | 0.00                               | 0.25                            | 0.00             |
|                                           | Maximum              | 4.0                              | 4.5                                | 6.0                             | 6.0              |

| 02 - Runny nose (daily mean)<br>(imputed) |                      | Stratum<br><= 12 hours<br>(N=122) | Stratum<br>12 - 24 hours<br>(N=88) | Stratum<br>> 24 hours<br>(N=98) | Total<br>(N=308) |
|-------------------------------------------|----------------------|-----------------------------------|------------------------------------|---------------------------------|------------------|
| 11                                        | N <sub>valid</sub>   | 122                               | 88                                 | 98                              | 308              |
|                                           | N <sub>missing</sub> | 0                                 | 0                                  | 0                               | 0                |
|                                           | <b>Mean</b>          | 0.35                              | 0.47                               | 0.90                            | 0.56             |
|                                           | SD                   | 0.77                              | 0.89                               | 1.48                            | 1.10             |
|                                           | Minimum              | 0.0                               | 0.0                                | 0.0                             | 0.0              |
|                                           | Median               | 0.00                              | 0.00                               | 0.00                            | 0.00             |
|                                           | Maximum              | 3.0                               | 3.5                                | 6.0                             | 6.0              |
| 12                                        | N <sub>valid</sub>   | 122                               | 88                                 | 98                              | 308              |
|                                           | N <sub>missing</sub> | 0                                 | 0                                  | 0                               | 0                |
|                                           | <b>Mean</b>          | 0.19                              | 0.35                               | 0.62                            | 0.37             |
|                                           | SD                   | 0.56                              | 0.78                               | 1.31                            | 0.93             |
|                                           | Minimum              | 0.0                               | 0.0                                | 0.0                             | 0.0              |
|                                           | Median               | 0.00                              | 0.00                               | 0.00                            | 0.00             |
|                                           | Maximum              | 2.5                               | 3.0                                | 6.0                             | 6.0              |
| 13                                        | N <sub>valid</sub>   | 122                               | 88                                 | 98                              | 308              |
|                                           | N <sub>missing</sub> | 0                                 | 0                                  | 0                               | 0                |
|                                           | <b>Mean</b>          | 0.16                              | 0.28                               | 0.54                            | 0.31             |
|                                           | SD                   | 0.53                              | 0.69                               | 1.18                            | 0.85             |
|                                           | Minimum              | 0.0                               | 0.0                                | 0.0                             | 0.0              |
|                                           | Median               | 0.00                              | 0.00                               | 0.00                            | 0.00             |
|                                           | Maximum              | 3.0                               | 3.0                                | 5.5                             | 5.5              |
| 14                                        | N <sub>valid</sub>   | 122                               | 88                                 | 98                              | 308              |
|                                           | N <sub>missing</sub> | 0                                 | 0                                  | 0                               | 0                |
|                                           | <b>Mean</b>          | 0.11                              | 0.19                               | 0.35                            | 0.21             |
|                                           | SD                   | 0.40                              | 0.50                               | 0.97                            | 0.67             |
|                                           | Minimum              | 0.0                               | 0.0                                | 0.0                             | 0.0              |
|                                           | Median               | 0.00                              | 0.00                               | 0.00                            | 0.00             |
|                                           | Maximum              | 3.0                               | 2.0                                | 5.0                             | 5.0              |
| 15                                        | N <sub>valid</sub>   | 122                               | 88                                 | 98                              | 308              |
|                                           | N <sub>missing</sub> | 0                                 | 0                                  | 0                               | 0                |
|                                           | <b>Mean</b>          | 0.06                              | 0.11                               | 0.25                            | 0.14             |
|                                           | SD                   | 0.33                              | 0.35                               | 0.93                            | 0.60             |
|                                           | Minimum              | 0.0                               | 0.0                                | 0.0                             | 0.0              |
|                                           | Median               | 0.00                              | 0.00                               | 0.00                            | 0.00             |
|                                           | Maximum              | 3.0                               | 1.5                                | 5.0                             | 5.0              |
| 16                                        | N <sub>valid</sub>   | 122                               | 88                                 | 98                              | 308              |
|                                           | N <sub>missing</sub> | 0                                 | 0                                  | 0                               | 0                |
|                                           | <b>Mean</b>          | 0.06                              | 0.10                               | 0.20                            | 0.12             |
|                                           | SD                   | 0.28                              | 0.32                               | 0.84                            | 0.53             |
|                                           | Minimum              | 0.0                               | 0.0                                | 0.0                             | 0.0              |
|                                           | Median               | 0.00                              | 0.00                               | 0.00                            | 0.00             |
|                                           | Maximum              | 2.0                               | 1.5                                | 6.0                             | 6.0              |
| 17                                        | N <sub>valid</sub>   | 122                               | 88                                 | 98                              | 308              |
|                                           | N <sub>missing</sub> | 0                                 | 0                                  | 0                               | 0                |
|                                           | <b>Mean</b>          | 0.06                              | 0.10                               | 0.21                            | 0.12             |
|                                           | SD                   | 0.28                              | 0.34                               | 0.91                            | 0.57             |
|                                           | Minimum              | 0.0                               | 0.0                                | 0.0                             | 0.0              |
|                                           | Median               | 0.00                              | 0.00                               | 0.00                            | 0.00             |
|                                           | Maximum              | 2.0                               | 1.5                                | 6.0                             | 6.0              |

| 03 - Plugged nose (daily mean)<br>(imputed) |                      | Stratum<br>≤ 12 hours<br>(N=122) | Stratum<br>12 - 24 hours<br>(N=88) | Stratum<br>> 24 hours<br>(N=98) | Total<br>(N=308) |
|---------------------------------------------|----------------------|----------------------------------|------------------------------------|---------------------------------|------------------|
| <b>Symptom day</b>                          |                      |                                  |                                    |                                 |                  |
| <b>1</b>                                    | N <sub>valid</sub>   | 122                              | 88                                 | 98                              | 304              |
|                                             | N <sub>missing</sub> | 0                                | 2                                  | 2                               | 4                |
|                                             | <b>Mean</b>          | 3.71                             | 3.87                               | 3.47                            | 3.68             |
|                                             | SD                   | 1.62                             | 1.77                               | 1.88                            | 1.75             |
|                                             | Minimum              | 0.0                              | 0.0                                | 0.0                             | 0.0              |
|                                             | Median               | 4.00                             | 4.00                               | 4.00                            | 4.00             |
|                                             | Maximum              | 7.0                              | 7.0                                | 7.0                             | 7.0              |
| <b>2</b>                                    | N <sub>valid</sub>   | 122                              | 88                                 | 98                              | 308              |
|                                             | N <sub>missing</sub> | 0                                | 0                                  | 0                               | 0                |
|                                             | <b>Mean</b>          | 3.36                             | 3.86                               | 3.69                            | 3.61             |
|                                             | SD                   | 1.69                             | 1.67                               | 1.72                            | 1.70             |
|                                             | Minimum              | 0.0                              | 0.0                                | 0.0                             | 0.0              |
|                                             | Median               | 3.50                             | 4.00                               | 4.00                            | 4.00             |
|                                             | Maximum              | 7.0                              | 7.0                                | 7.0                             | 7.0              |
| <b>3</b>                                    | N <sub>valid</sub>   | 122                              | 88                                 | 98                              | 308              |
|                                             | N <sub>missing</sub> | 0                                | 0                                  | 0                               | 0                |
|                                             | <b>Mean</b>          | 2.82                             | 3.65                               | 3.45                            | 3.26             |
|                                             | SD                   | 1.65                             | 1.59                               | 1.73                            | 1.69             |
|                                             | Minimum              | 0.0                              | 0.5                                | 0.0                             | 0.0              |
|                                             | Median               | 3.00                             | 4.00                               | 3.50                            | 3.50             |
|                                             | Maximum              | 6.0                              | 7.0                                | 6.5                             | 7.0              |
| <b>4</b>                                    | N <sub>valid</sub>   | 122                              | 88                                 | 98                              | 308              |
|                                             | N <sub>missing</sub> | 0                                | 0                                  | 0                               | 0                |
|                                             | <b>Mean</b>          | 2.32                             | 3.05                               | 3.31                            | 2.84             |
|                                             | SD                   | 1.67                             | 1.55                               | 1.69                            | 1.69             |
|                                             | Minimum              | 0.0                              | 0.0                                | 0.0                             | 0.0              |
|                                             | Median               | 2.00                             | 3.00                               | 3.25                            | 3.00             |
|                                             | Maximum              | 6.0                              | 7.0                                | 7.0                             | 7.0              |
| <b>5</b>                                    | N <sub>valid</sub>   | 122                              | 88                                 | 98                              | 308              |
|                                             | N <sub>missing</sub> | 0                                | 0                                  | 0                               | 0                |
|                                             | <b>Mean</b>          | 1.86                             | 2.73                               | 2.98                            | 2.47             |
|                                             | SD                   | 1.59                             | 1.59                               | 1.79                            | 1.73             |
|                                             | Minimum              | 0.0                              | 0.0                                | 0.0                             | 0.0              |
|                                             | Median               | 1.50                             | 2.75                               | 3.00                            | 2.50             |
|                                             | Maximum              | 6.0                              | 6.5                                | 6.0                             | 6.5              |
| <b>6</b>                                    | N <sub>valid</sub>   | 122                              | 88                                 | 98                              | 308              |
|                                             | N <sub>missing</sub> | 0                                | 0                                  | 0                               | 0                |
|                                             | <b>Mean</b>          | 1.53                             | 2.14                               | 2.59                            | 2.04             |
|                                             | SD                   | 1.51                             | 1.45                               | 1.87                            | 1.68             |
|                                             | Minimum              | 0.0                              | 0.0                                | 0.0                             | 0.0              |
|                                             | Median               | 1.00                             | 2.00                               | 2.50                            | 1.50             |
|                                             | Maximum              | 5.5                              | 6.0                                | 6.0                             | 6.0              |
| <b>7</b>                                    | N <sub>valid</sub>   | 122                              | 88                                 | 98                              | 308              |
|                                             | N <sub>missing</sub> | 0                                | 0                                  | 0                               | 0                |
|                                             | <b>Mean</b>          | 1.14                             | 1.75                               | 2.18                            | 1.65             |
|                                             | SD                   | 1.43                             | 1.54                               | 1.86                            | 1.66             |
|                                             | Minimum              | 0.0                              | 0.0                                | 0.0                             | 0.0              |
|                                             | Median               | 0.50                             | 1.50                               | 2.50                            | 1.00             |
|                                             | Maximum              | 6.0                              | 5.0                                | 7.0                             | 7.0              |

| 03 - Plugged nose (daily mean)<br>(imputed) |                      | Stratum<br>≤ 12 hours<br>(N=122) | Stratum<br>12 - 24 hours<br>(N=88) | Stratum<br>> 24 hours<br>(N=98) | Total<br>(N=308) |
|---------------------------------------------|----------------------|----------------------------------|------------------------------------|---------------------------------|------------------|
| 8                                           | N <sub>valid</sub>   | 122                              | 88                                 | 98                              | 308              |
|                                             | N <sub>missing</sub> | 0                                | 0                                  | 0                               | 0                |
|                                             | <b>Mean</b>          | 0.86                             | 1.42                               | 1.74                            | 1.30             |
|                                             | SD                   | 1.34                             | 1.54                               | 1.73                            | 1.57             |
|                                             | Minimum              | 0.0                              | 0.0                                | 0.0                             | 0.0              |
|                                             | Median               | 0.00                             | 1.00                               | 1.50                            | 0.50             |
|                                             | Maximum              | 5.5                              | 5.0                                | 7.0                             | 7.0              |
| 9                                           | N <sub>valid</sub>   | 122                              | 88                                 | 98                              | 308              |
|                                             | N <sub>missing</sub> | 0                                | 0                                  | 0                               | 0                |
|                                             | <b>Mean</b>          | 0.71                             | 1.06                               | 1.41                            | 1.04             |
|                                             | SD                   | 1.23                             | 1.47                               | 1.64                            | 1.47             |
|                                             | Minimum              | 0.0                              | 0.0                                | 0.0                             | 0.0              |
|                                             | Median               | 0.00                             | 0.00                               | 1.00                            | 0.00             |
|                                             | Maximum              | 5.0                              | 5.0                                | 7.0                             | 7.0              |
| 10                                          | N <sub>valid</sub>   | 122                              | 88                                 | 98                              | 308              |
|                                             | N <sub>missing</sub> | 0                                | 0                                  | 0                               | 0                |
|                                             | <b>Mean</b>          | 0.53                             | 0.86                               | 1.13                            | 0.82             |
|                                             | SD                   | 1.11                             | 1.35                               | 1.56                            | 1.35             |
|                                             | Minimum              | 0.0                              | 0.0                                | 0.0                             | 0.0              |
|                                             | Median               | 0.00                             | 0.00                               | 0.00                            | 0.00             |
|                                             | Maximum              | 5.0                              | 5.0                                | 7.0                             | 7.0              |
| 11                                          | N <sub>valid</sub>   | 122                              | 88                                 | 98                              | 308              |
|                                             | N <sub>missing</sub> | 0                                | 0                                  | 0                               | 0                |
|                                             | <b>Mean</b>          | 0.40                             | 0.60                               | 0.90                            | 0.62             |
|                                             | SD                   | 0.95                             | 1.03                               | 1.49                            | 1.18             |
|                                             | Minimum              | 0.0                              | 0.0                                | 0.0                             | 0.0              |
|                                             | Median               | 0.00                             | 0.00                               | 0.00                            | 0.00             |
|                                             | Maximum              | 5.0                              | 4.0                                | 7.0                             | 7.0              |
| 12                                          | N <sub>valid</sub>   | 122                              | 88                                 | 98                              | 308              |
|                                             | N <sub>missing</sub> | 0                                | 0                                  | 0                               | 0                |
|                                             | <b>Mean</b>          | 0.28                             | 0.56                               | 0.68                            | 0.49             |
|                                             | SD                   | 0.74                             | 1.11                               | 1.34                            | 1.08             |
|                                             | Minimum              | 0.0                              | 0.0                                | 0.0                             | 0.0              |
|                                             | Median               | 0.00                             | 0.00                               | 0.00                            | 0.00             |
|                                             | Maximum              | 4.0                              | 5.0                                | 7.0                             | 7.0              |
| 13                                          | N <sub>valid</sub>   | 122                              | 88                                 | 98                              | 308              |
|                                             | N <sub>missing</sub> | 0                                | 0                                  | 0                               | 0                |
|                                             | <b>Mean</b>          | 0.24                             | 0.39                               | 0.58                            | 0.39             |
|                                             | SD                   | 0.71                             | 0.88                               | 1.27                            | 0.97             |
|                                             | Minimum              | 0.0                              | 0.0                                | 0.0                             | 0.0              |
|                                             | Median               | 0.00                             | 0.00                               | 0.00                            | 0.00             |
|                                             | Maximum              | 4.0                              | 4.0                                | 7.0                             | 7.0              |
| 14                                          | N <sub>valid</sub>   | 122                              | 88                                 | 98                              | 308              |
|                                             | N <sub>missing</sub> | 0                                | 0                                  | 0                               | 0                |
|                                             | <b>Mean</b>          | 0.18                             | 0.30                               | 0.44                            | 0.29             |
|                                             | SD                   | 0.63                             | 0.72                               | 1.10                            | 0.84             |
|                                             | Minimum              | 0.0                              | 0.0                                | 0.0                             | 0.0              |
|                                             | Median               | 0.00                             | 0.00                               | 0.00                            | 0.00             |
|                                             | Maximum              | 3.5                              | 4.0                                | 5.5                             | 5.5              |

| 03 - Plugged nose (daily mean)<br>(imputed) |                      | Stratum<br>≤ 12 hours<br>(N=122) | Stratum<br>12 - 24 hours<br>(N=88) | Stratum<br>> 24 hours<br>(N=98) | Total<br>(N=308) |
|---------------------------------------------|----------------------|----------------------------------|------------------------------------|---------------------------------|------------------|
| 15                                          | N <sub>valid</sub>   | 122                              | 88                                 | 98                              | 308              |
|                                             | N <sub>missing</sub> | 0                                | 0                                  | 0                               | 0                |
|                                             | Mean                 | 0.18                             | 0.21                               | 0.34                            | 0.24             |
|                                             | SD                   | 0.66                             | 0.62                               | 1.03                            | 0.79             |
|                                             | Minimum              | 0.0                              | 0.0                                | 0.0                             | 0.0              |
|                                             | Median               | 0.00                             | 0.00                               | 0.00                            | 0.00             |
|                                             | Maximum              | 4.0                              | 4.0                                | 5.0                             | 5.0              |
| 16                                          | N <sub>valid</sub>   | 122                              | 88                                 | 98                              | 308              |
|                                             | N <sub>missing</sub> | 0                                | 0                                  | 0                               | 0                |
|                                             | Mean                 | 0.15                             | 0.19                               | 0.25                            | 0.19             |
|                                             | SD                   | 0.57                             | 0.61                               | 0.97                            | 0.73             |
|                                             | Minimum              | 0.0                              | 0.0                                | 0.0                             | 0.0              |
|                                             | Median               | 0.00                             | 0.00                               | 0.00                            | 0.00             |
|                                             | Maximum              | 3.5                              | 4.0                                | 5.5                             | 5.5              |
| 17                                          | N <sub>valid</sub>   | 122                              | 88                                 | 98                              | 308              |
|                                             | N <sub>missing</sub> | 0                                | 0                                  | 0                               | 0                |
|                                             | Mean                 | 0.15                             | 0.16                               | 0.24                            | 0.18             |
|                                             | SD                   | 0.57                             | 0.58                               | 0.97                            | 0.72             |
|                                             | Minimum              | 0.0                              | 0.0                                | 0.0                             | 0.0              |
|                                             | Median               | 0.00                             | 0.00                               | 0.00                            | 0.00             |
|                                             | Maximum              | 3.5                              | 4.0                                | 5.0                             | 5.0              |

| 04 - Sneezing (daily mean)<br>(imputed) |                      | Stratum<br>≤ 12 hours<br>(N=122) | Stratum<br>12 - 24 hours<br>(N=88) | Stratum<br>> 24 hours<br>(N=98) | Total<br>(N=308) |
|-----------------------------------------|----------------------|----------------------------------|------------------------------------|---------------------------------|------------------|
| Symptom day                             |                      |                                  |                                    |                                 |                  |
| 1                                       | N <sub>valid</sub>   | 122                              | 86                                 | 96                              | 304              |
|                                         | N <sub>missing</sub> | 0                                | 2                                  | 2                               | 4                |
|                                         | Mean                 | 2.79                             | 3.28                               | 2.94                            | 2.98             |
|                                         | SD                   | 1.67                             | 1.77                               | 1.76                            | 1.73             |
|                                         | Minimum              | 0.0                              | 0.0                                | 0.0                             | 0.0              |
|                                         | Median               | 3.00                             | 3.50                               | 3.00                            | 3.00             |
|                                         | Maximum              | 7.0                              | 6.0                                | 7.0                             | 7.0              |
| 2                                       | N <sub>valid</sub>   | 122                              | 88                                 | 98                              | 308              |
|                                         | N <sub>missing</sub> | 0                                | 0                                  | 0                               | 0                |
|                                         | Mean                 | 2.29                             | 2.91                               | 3.07                            | 2.71             |
|                                         | SD                   | 1.55                             | 1.72                               | 1.56                            | 1.64             |
|                                         | Minimum              | 0.0                              | 0.0                                | 0.0                             | 0.0              |
|                                         | Median               | 2.50                             | 3.00                               | 3.00                            | 3.00             |
|                                         | Maximum              | 6.5                              | 6.0                                | 6.0                             | 6.5              |
| 3                                       | N <sub>valid</sub>   | 122                              | 88                                 | 98                              | 308              |
|                                         | N <sub>missing</sub> | 0                                | 0                                  | 0                               | 0                |
|                                         | Mean                 | 1.88                             | 2.59                               | 2.82                            | 2.38             |
|                                         | SD                   | 1.52                             | 1.72                               | 1.69                            | 1.68             |
|                                         | Minimum              | 0.0                              | 0.0                                | 0.0                             | 0.0              |
|                                         | Median               | 1.50                             | 2.50                               | 3.00                            | 2.50             |
|                                         | Maximum              | 5.5                              | 6.0                                | 6.0                             | 6.0              |

| 04 - Sneezing (daily mean)<br>(imputed) |                      | Stratum<br><= 12 hours<br>(N=122) | Stratum<br>12 - 24 hours<br>(N=88) | Stratum<br>> 24 hours<br>(N=98) | Total<br>(N=308) |
|-----------------------------------------|----------------------|-----------------------------------|------------------------------------|---------------------------------|------------------|
| 4                                       | N <sub>valid</sub>   | 122                               | 88                                 | 98                              | 308              |
|                                         | N <sub>missing</sub> | 0                                 | 0                                  | 0                               | 0                |
|                                         | <b>Mean</b>          | 1.54                              | 2.38                               | 2.70                            | 2.15             |
|                                         | SD                   | 1.47                              | 1.65                               | 1.73                            | 1.68             |
|                                         | Minimum              | 0.0                               | 0.0                                | 0.0                             | 0.0              |
|                                         | Median               | 1.00                              | 2.50                               | 2.50                            | 2.00             |
|                                         | Maximum              | 5.0                               | 6.0                                | 6.0                             | 6.0              |
| 5                                       | N <sub>valid</sub>   | 122                               | 88                                 | 98                              | 308              |
|                                         | N <sub>missing</sub> | 0                                 | 0                                  | 0                               | 0                |
|                                         | <b>Mean</b>          | 1.22                              | 1.91                               | 2.44                            | 1.81             |
|                                         | SD                   | 1.30                              | 1.59                               | 1.79                            | 1.63             |
|                                         | Minimum              | 0.0                               | 0.0                                | 0.0                             | 0.0              |
|                                         | Median               | 1.00                              | 1.75                               | 2.50                            | 1.50             |
|                                         | Maximum              | 5.0                               | 5.5                                | 6.0                             | 6.0              |
| 6                                       | N <sub>valid</sub>   | 122                               | 88                                 | 98                              | 308              |
|                                         | N <sub>missing</sub> | 0                                 | 0                                  | 0                               | 0                |
|                                         | <b>Mean</b>          | 0.93                              | 1.51                               | 2.02                            | 1.44             |
|                                         | SD                   | 1.26                              | 1.42                               | 1.83                            | 1.57             |
|                                         | Minimum              | 0.0                               | 0.0                                | 0.0                             | 0.0              |
|                                         | Median               | 0.50                              | 1.00                               | 1.50                            | 1.00             |
|                                         | Maximum              | 4.5                               | 5.0                                | 6.0                             | 6.0              |
| 7                                       | N <sub>valid</sub>   | 122                               | 88                                 | 98                              | 308              |
|                                         | N <sub>missing</sub> | 0                                 | 0                                  | 0                               | 0                |
|                                         | <b>Mean</b>          | 0.66                              | 1.17                               | 1.77                            | 1.16             |
|                                         | SD                   | 1.07                              | 1.41                               | 1.76                            | 1.49             |
|                                         | Minimum              | 0.0                               | 0.0                                | 0.0                             | 0.0              |
|                                         | Median               | 0.00                              | 0.50                               | 1.00                            | 0.50             |
|                                         | Maximum              | 4.5                               | 5.0                                | 6.0                             | 6.0              |
| 8                                       | N <sub>valid</sub>   | 122                               | 88                                 | 98                              | 308              |
|                                         | N <sub>missing</sub> | 0                                 | 0                                  | 0                               | 0                |
|                                         | <b>Mean</b>          | 0.50                              | 0.91                               | 1.42                            | 0.91             |
|                                         | SD                   | 0.94                              | 1.34                               | 1.62                            | 1.36             |
|                                         | Minimum              | 0.0                               | 0.0                                | 0.0                             | 0.0              |
|                                         | Median               | 0.00                              | 0.00                               | 1.00                            | 0.00             |
|                                         | Maximum              | 4.0                               | 5.0                                | 6.0                             | 6.0              |
| 9                                       | N <sub>valid</sub>   | 122                               | 88                                 | 98                              | 308              |
|                                         | N <sub>missing</sub> | 0                                 | 0                                  | 0                               | 0                |
|                                         | <b>Mean</b>          | 0.38                              | 0.73                               | 1.12                            | 0.72             |
|                                         | SD                   | 0.93                              | 1.30                               | 1.52                            | 1.28             |
|                                         | Minimum              | 0.0                               | 0.0                                | 0.0                             | 0.0              |
|                                         | Median               | 0.00                              | 0.00                               | 0.00                            | 0.00             |
|                                         | Maximum              | 5.0                               | 5.0                                | 6.0                             | 6.0              |
| 10                                      | N <sub>valid</sub>   | 122                               | 88                                 | 98                              | 308              |
|                                         | N <sub>missing</sub> | 0                                 | 0                                  | 0                               | 0                |
|                                         | <b>Mean</b>          | 0.32                              | 0.56                               | 0.95                            | 0.59             |
|                                         | SD                   | 0.78                              | 1.12                               | 1.44                            | 1.15             |
|                                         | Minimum              | 0.0                               | 0.0                                | 0.0                             | 0.0              |
|                                         | Median               | 0.00                              | 0.00                               | 0.00                            | 0.00             |
|                                         | Maximum              | 3.7                               | 4.5                                | 6.0                             | 6.0              |

| 04 - Sneezing (daily mean)<br>(imputed) |                      | Stratum<br>≤ 12 hours<br>(N=122) | Stratum<br>12 - 24 hours<br>(N=88) | Stratum<br>> 24 hours<br>(N=98) | Total<br>(N=308) |
|-----------------------------------------|----------------------|----------------------------------|------------------------------------|---------------------------------|------------------|
| <b>11</b>                               | N <sub>valid</sub>   | 122                              | 88                                 | 98                              | 308              |
|                                         | N <sub>missing</sub> | 0                                | 0                                  | 0                               | 0                |
|                                         | <b>Mean</b>          | 0.23                             | 0.33                               | 0.81                            | 0.44             |
|                                         | SD                   | 0.63                             | 0.74                               | 1.41                            | 1.00             |
|                                         | Minimum              | 0.0                              | 0.0                                | 0.0                             | 0.0              |
|                                         | Median               | 0.00                             | 0.00                               | 0.00                            | 0.00             |
|                                         | Maximum              | 3.0                              | 3.5                                | 6.0                             | 6.0              |
| <b>12</b>                               | N <sub>valid</sub>   | 122                              | 88                                 | 98                              | 308              |
|                                         | N <sub>missing</sub> | 0                                | 0                                  | 0                               | 0                |
|                                         | <b>Mean</b>          | 0.18                             | 0.23                               | 0.53                            | 0.30             |
|                                         | SD                   | 0.68                             | 0.62                               | 1.09                            | 0.80             |
|                                         | Minimum              | 0.0                              | 0.0                                | 0.0                             | 0.0              |
|                                         | Median               | 0.00                             | 0.00                               | 0.00                            | 0.00             |
|                                         | Maximum              | 3.5                              | 3.0                                | 5.5                             | 5.5              |
| <b>13</b>                               | N <sub>valid</sub>   | 122                              | 88                                 | 98                              | 308              |
|                                         | N <sub>missing</sub> | 0                                | 0                                  | 0                               | 0                |
|                                         | <b>Mean</b>          | 0.09                             | 0.22                               | 0.45                            | 0.25             |
|                                         | SD                   | 0.32                             | 0.62                               | 1.04                            | 0.72             |
|                                         | Minimum              | 0.0                              | 0.0                                | 0.0                             | 0.0              |
|                                         | Median               | 0.00                             | 0.00                               | 0.00                            | 0.00             |
|                                         | Maximum              | 2.0                              | 3.0                                | 5.0                             | 5.0              |
| <b>14</b>                               | N <sub>valid</sub>   | 122                              | 88                                 | 98                              | 308              |
|                                         | N <sub>missing</sub> | 0                                | 0                                  | 0                               | 0                |
|                                         | <b>Mean</b>          | 0.07                             | 0.15                               | 0.31                            | 0.17             |
|                                         | SD                   | 0.36                             | 0.47                               | 0.84                            | 0.59             |
|                                         | Minimum              | 0.0                              | 0.0                                | 0.0                             | 0.0              |
|                                         | Median               | 0.00                             | 0.00                               | 0.00                            | 0.00             |
|                                         | Maximum              | 3.5                              | 2.5                                | 4.0                             | 4.0              |
| <b>15</b>                               | N <sub>valid</sub>   | 122                              | 88                                 | 98                              | 308              |
|                                         | N <sub>missing</sub> | 0                                | 0                                  | 0                               | 0                |
|                                         | <b>Mean</b>          | 0.04                             | 0.07                               | 0.24                            | 0.11             |
|                                         | SD                   | 0.27                             | 0.29                               | 0.93                            | 0.57             |
|                                         | Minimum              | 0.0                              | 0.0                                | 0.0                             | 0.0              |
|                                         | Median               | 0.00                             | 0.00                               | 0.00                            | 0.00             |
|                                         | Maximum              | 2.5                              | 1.5                                | 5.0                             | 5.0              |
| <b>16</b>                               | N <sub>valid</sub>   | 122                              | 88                                 | 98                              | 308              |
|                                         | N <sub>missing</sub> | 0                                | 0                                  | 0                               | 0                |
|                                         | <b>Mean</b>          | 0.04                             | 0.05                               | 0.14                            | 0.07             |
|                                         | SD                   | 0.27                             | 0.24                               | 0.62                            | 0.41             |
|                                         | Minimum              | 0.0                              | 0.0                                | 0.0                             | 0.0              |
|                                         | Median               | 0.00                             | 0.00                               | 0.00                            | 0.00             |
|                                         | Maximum              | 2.5                              | 1.5                                | 3.5                             | 3.5              |
| <b>17</b>                               | N <sub>valid</sub>   | 122                              | 88                                 | 98                              | 308              |
|                                         | N <sub>missing</sub> | 0                                | 0                                  | 0                               | 0                |
|                                         | <b>Mean</b>          | 0.04                             | 0.05                               | 0.15                            | 0.08             |
|                                         | SD                   | 0.27                             | 0.24                               | 0.65                            | 0.43             |
|                                         | Minimum              | 0.0                              | 0.0                                | 0.0                             | 0.0              |
|                                         | Median               | 0.00                             | 0.00                               | 0.00                            | 0.00             |
|                                         | Maximum              | 2.5                              | 1.5                                | 4.0                             | 4.0              |



| 05 - Sore throat (daily mean)<br>(imputed) |                      | Stratum<br>≤ 12 hours<br>(N=122) | Stratum<br>12 - 24 hours<br>(N=88) | Stratum<br>> 24 hours<br>(N=98) | Total<br>(N=308) |
|--------------------------------------------|----------------------|----------------------------------|------------------------------------|---------------------------------|------------------|
| <b>Symptom day</b>                         |                      |                                  |                                    |                                 |                  |
| <b>1</b>                                   | N <sub>valid</sub>   | 122                              | 86                                 | 96                              | 304              |
|                                            | N <sub>missing</sub> | 0                                | 2                                  | 2                               | 4                |
|                                            | <b>Mean</b>          | 3.01                             | 3.49                               | 3.29                            | 3.23             |
|                                            | SD                   | 1.91                             | 2.10                               | 1.64                            | 1.89             |
|                                            | Minimum              | 0.0                              | 0.0                                | 0.0                             | 0.0              |
|                                            | Median               | 3.00                             | 4.00                               | 3.50                            | 3.50             |
|                                            | Maximum              | 7.0                              | 7.0                                | 7.0                             | 7.0              |
| <b>2</b>                                   | N <sub>valid</sub>   | 122                              | 88                                 | 98                              | 308              |
|                                            | N <sub>missing</sub> | 0                                | 0                                  | 0                               | 0                |
|                                            | <b>Mean</b>          | 2.50                             | 3.32                               | 3.45                            | 3.04             |
|                                            | SD                   | 1.82                             | 1.95                               | 1.66                            | 1.85             |
|                                            | Minimum              | 0.0                              | 0.0                                | 0.0                             | 0.0              |
|                                            | Median               | 2.50                             | 3.50                               | 3.50                            | 3.00             |
|                                            | Maximum              | 7.0                              | 7.0                                | 7.0                             | 7.0              |
| <b>3</b>                                   | N <sub>valid</sub>   | 122                              | 88                                 | 98                              | 308              |
|                                            | N <sub>missing</sub> | 0                                | 0                                  | 0                               | 0                |
|                                            | <b>Mean</b>          | 1.89                             | 2.95                               | 3.33                            | 2.65             |
|                                            | SD                   | 1.63                             | 1.84                               | 1.68                            | 1.82             |
|                                            | Minimum              | 0.0                              | 0.0                                | 0.0                             | 0.0              |
|                                            | Median               | 1.50                             | 3.00                               | 3.25                            | 3.00             |
|                                            | Maximum              | 6.0                              | 7.0                                | 7.0                             | 7.0              |
| <b>4</b>                                   | N <sub>valid</sub>   | 122                              | 88                                 | 98                              | 308              |
|                                            | N <sub>missing</sub> | 0                                | 0                                  | 0                               | 0                |
|                                            | <b>Mean</b>          | 1.55                             | 2.56                               | 3.05                            | 2.32             |
|                                            | SD                   | 1.63                             | 1.80                               | 1.77                            | 1.84             |
|                                            | Minimum              | 0.0                              | 0.0                                | 0.0                             | 0.0              |
|                                            | Median               | 1.00                             | 3.00                               | 3.00                            | 2.00             |
|                                            | Maximum              | 6.0                              | 6.0                                | 7.0                             | 7.0              |
| <b>5</b>                                   | N <sub>valid</sub>   | 122                              | 88                                 | 98                              | 308              |
|                                            | N <sub>missing</sub> | 0                                | 0                                  | 0                               | 0                |
|                                            | <b>Mean</b>          | 1.23                             | 2.02                               | 2.73                            | 1.94             |
|                                            | SD                   | 1.55                             | 1.67                               | 1.77                            | 1.77             |
|                                            | Minimum              | 0.0                              | 0.0                                | 0.0                             | 0.0              |
|                                            | Median               | 0.50                             | 2.00                               | 3.00                            | 1.50             |
|                                            | Maximum              | 5.5                              | 5.0                                | 6.5                             | 6.5              |
| <b>6</b>                                   | N <sub>valid</sub>   | 122                              | 88                                 | 98                              | 308              |
|                                            | N <sub>missing</sub> | 0                                | 0                                  | 0                               | 0                |
|                                            | <b>Mean</b>          | 0.94                             | 1.71                               | 2.35                            | 1.61             |
|                                            | SD                   | 1.36                             | 1.67                               | 1.87                            | 1.73             |
|                                            | Minimum              | 0.0                              | 0.0                                | 0.0                             | 0.0              |
|                                            | Median               | 0.00                             | 1.50                               | 2.50                            | 1.00             |
|                                            | Maximum              | 5.0                              | 5.5                                | 6.0                             | 6.0              |
| <b>7</b>                                   | N <sub>valid</sub>   | 122                              | 88                                 | 98                              | 308              |
|                                            | N <sub>missing</sub> | 0                                | 0                                  | 0                               | 0                |
|                                            | <b>Mean</b>          | 0.77                             | 1.27                               | 1.97                            | 1.30             |
|                                            | SD                   | 1.30                             | 1.54                               | 1.80                            | 1.62             |
|                                            | Minimum              | 0.0                              | 0.0                                | 0.0                             | 0.0              |
|                                            | Median               | 0.00                             | 0.75                               | 1.50                            | 0.50             |
|                                            | Maximum              | 6.0                              | 5.0                                | 6.0                             | 6.0              |

| 05 - Sore throat (daily mean)<br>(imputed) |                      | Stratum<br>≤ 12 hours<br>(N=122) | Stratum<br>12 - 24 hours<br>(N=88) | Stratum<br>> 24 hours<br>(N=98) | Total<br>(N=308) |
|--------------------------------------------|----------------------|----------------------------------|------------------------------------|---------------------------------|------------------|
| 8                                          | N <sub>valid</sub>   | 122                              | 88                                 | 98                              | 308              |
|                                            | N <sub>missing</sub> | 0                                | 0                                  | 0                               | 0                |
|                                            | Mean                 | 0.55                             | 0.99                               | 1.58                            | 1.00             |
|                                            | SD                   | 1.14                             | 1.51                               | 1.63                            | 1.48             |
|                                            | Minimum              | 0.0                              | 0.0                                | 0.0                             | 0.0              |
|                                            | Median               | 0.00                             | 0.00                               | 1.00                            | 0.00             |
|                                            | Maximum              | 4.5                              | 6.0                                | 5.0                             | 6.0              |
| 9                                          | N <sub>valid</sub>   | 122                              | 88                                 | 98                              | 308              |
|                                            | N <sub>missing</sub> | 0                                | 0                                  | 0                               | 0                |
|                                            | Mean                 | 0.42                             | 0.77                               | 1.13                            | 0.75             |
|                                            | SD                   | 1.00                             | 1.43                               | 1.46                            | 1.32             |
|                                            | Minimum              | 0.0                              | 0.0                                | 0.0                             | 0.0              |
|                                            | Median               | 0.00                             | 0.00                               | 0.50                            | 0.00             |
|                                            | Maximum              | 4.0                              | 5.5                                | 5.0                             | 5.5              |
| 10                                         | N <sub>valid</sub>   | 122                              | 88                                 | 98                              | 308              |
|                                            | N <sub>missing</sub> | 0                                | 0                                  | 0                               | 0                |
|                                            | Mean                 | 0.36                             | 0.61                               | 0.88                            | 0.59             |
|                                            | SD                   | 0.89                             | 1.27                               | 1.44                            | 1.22             |
|                                            | Minimum              | 0.0                              | 0.0                                | 0.0                             | 0.0              |
|                                            | Median               | 0.00                             | 0.00                               | 0.00                            | 0.00             |
|                                            | Maximum              | 4.3                              | 4.5                                | 5.0                             | 5.0              |
| 11                                         | N <sub>valid</sub>   | 122                              | 88                                 | 98                              | 308              |
|                                            | N <sub>missing</sub> | 0                                | 0                                  | 0                               | 0                |
|                                            | Mean                 | 0.29                             | 0.38                               | 0.75                            | 0.46             |
|                                            | SD                   | 0.79                             | 0.96                               | 1.33                            | 1.05             |
|                                            | Minimum              | 0.0                              | 0.0                                | 0.0                             | 0.0              |
|                                            | Median               | 0.00                             | 0.00                               | 0.00                            | 0.00             |
|                                            | Maximum              | 4.0                              | 4.0                                | 5.0                             | 5.0              |
| 12                                         | N <sub>valid</sub>   | 122                              | 88                                 | 98                              | 308              |
|                                            | N <sub>missing</sub> | 0                                | 0                                  | 0                               | 0                |
|                                            | Mean                 | 0.22                             | 0.28                               | 0.53                            | 0.34             |
|                                            | SD                   | 0.70                             | 0.84                               | 1.13                            | 0.90             |
|                                            | Minimum              | 0.0                              | 0.0                                | 0.0                             | 0.0              |
|                                            | Median               | 0.00                             | 0.00                               | 0.00                            | 0.00             |
|                                            | Maximum              | 5.0                              | 4.0                                | 5.0                             | 5.0              |
| 13                                         | N <sub>valid</sub>   | 122                              | 88                                 | 98                              | 308              |
|                                            | N <sub>missing</sub> | 0                                | 0                                  | 0                               | 0                |
|                                            | Mean                 | 0.12                             | 0.20                               | 0.46                            | 0.25             |
|                                            | SD                   | 0.45                             | 0.67                               | 1.01                            | 0.74             |
|                                            | Minimum              | 0.0                              | 0.0                                | 0.0                             | 0.0              |
|                                            | Median               | 0.00                             | 0.00                               | 0.00                            | 0.00             |
|                                            | Maximum              | 3.0                              | 3.5                                | 5.0                             | 5.0              |
| 14                                         | N <sub>valid</sub>   | 122                              | 88                                 | 98                              | 308              |
|                                            | N <sub>missing</sub> | 0                                | 0                                  | 0                               | 0                |
|                                            | Mean                 | 0.11                             | 0.16                               | 0.28                            | 0.18             |
|                                            | SD                   | 0.47                             | 0.55                               | 0.76                            | 0.60             |
|                                            | Minimum              | 0.0                              | 0.0                                | 0.0                             | 0.0              |
|                                            | Median               | 0.00                             | 0.00                               | 0.00                            | 0.00             |
|                                            | Maximum              | 3.5                              | 3.0                                | 4.0                             | 4.0              |

| 05 - Sore throat (daily mean)<br>(imputed) |                      | Stratum<br>≤ 12 hours<br>(N=122) | Stratum<br>12 - 24 hours<br>(N=88) | Stratum<br>> 24 hours<br>(N=98) | Total<br>(N=308) |
|--------------------------------------------|----------------------|----------------------------------|------------------------------------|---------------------------------|------------------|
| 15                                         | N <sub>valid</sub>   | 122                              | 88                                 | 98                              | 308              |
|                                            | N <sub>missing</sub> | 0                                | 0                                  | 0                               | 0                |
|                                            | Mean                 | 0.07                             | 0.09                               | 0.18                            | 0.11             |
|                                            | SD                   | 0.33                             | 0.41                               | 0.67                            | 0.48             |
|                                            | Minimum              | 0.0                              | 0.0                                | 0.0                             | 0.0              |
|                                            | Median               | 0.00                             | 0.00                               | 0.00                            | 0.00             |
|                                            | Maximum              | 2.5                              | 3.0                                | 3.5                             | 3.5              |
| 16                                         | N <sub>valid</sub>   | 122                              | 88                                 | 98                              | 308              |
|                                            | N <sub>missing</sub> | 0                                | 0                                  | 0                               | 0                |
|                                            | Mean                 | 0.07                             | 0.09                               | 0.12                            | 0.09             |
|                                            | SD                   | 0.27                             | 0.40                               | 0.52                            | 0.40             |
|                                            | Minimum              | 0.0                              | 0.0                                | 0.0                             | 0.0              |
|                                            | Median               | 0.00                             | 0.00                               | 0.00                            | 0.00             |
|                                            | Maximum              | 1.5                              | 3.0                                | 3.0                             | 3.0              |
| 17                                         | N <sub>valid</sub>   | 122                              | 88                                 | 98                              | 308              |
|                                            | N <sub>missing</sub> | 0                                | 0                                  | 0                               | 0                |
|                                            | Mean                 | 0.07                             | 0.09                               | 0.14                            | 0.09             |
|                                            | SD                   | 0.27                             | 0.40                               | 0.59                            | 0.43             |
|                                            | Minimum              | 0.0                              | 0.0                                | 0.0                             | 0.0              |
|                                            | Median               | 0.00                             | 0.00                               | 0.00                            | 0.00             |
|                                            | Maximum              | 1.5                              | 3.0                                | 3.0                             | 3.0              |

| 06 - Scratchy throat (daily mean)<br>(imputed) |                      | Stratum<br>≤ 12 hours<br>(N=122) | Stratum<br>12 - 24 hours<br>(N=88) | Stratum<br>> 24 hours<br>(N=98) | Total<br>(N=308) |
|------------------------------------------------|----------------------|----------------------------------|------------------------------------|---------------------------------|------------------|
| <b>Symptom day</b>                             |                      |                                  |                                    |                                 |                  |
| 1                                              | N <sub>valid</sub>   | 122                              | 86                                 | 96                              | 304              |
|                                                | N <sub>missing</sub> | 0                                | 2                                  | 2                               | 4                |
|                                                | Mean                 | 2.80                             | 3.57                               | 2.95                            | 3.06             |
|                                                | SD                   | 1.78                             | 1.90                               | 1.76                            | 1.83             |
|                                                | Minimum              | 0.0                              | 0.0                                | 0.0                             | 0.0              |
|                                                | Median               | 2.50                             | 3.75                               | 3.00                            | 3.00             |
|                                                | Maximum              | 6.0                              | 7.0                                | 7.0                             | 7.0              |
| 2                                              | N <sub>valid</sub>   | 122                              | 88                                 | 98                              | 308              |
|                                                | N <sub>missing</sub> | 0                                | 0                                  | 0                               | 0                |
|                                                | Mean                 | 2.58                             | 3.43                               | 3.16                            | 3.01             |
|                                                | SD                   | 1.76                             | 1.69                               | 1.64                            | 1.73             |
|                                                | Minimum              | 0.0                              | 0.0                                | 0.0                             | 0.0              |
|                                                | Median               | 2.75                             | 3.50                               | 3.50                            | 3.00             |
|                                                | Maximum              | 7.0                              | 7.0                                | 7.0                             | 7.0              |
| 3                                              | N <sub>valid</sub>   | 122                              | 88                                 | 98                              | 308              |
|                                                | N <sub>missing</sub> | 0                                | 0                                  | 0                               | 0                |
|                                                | Mean                 | 2.00                             | 3.05                               | 3.09                            | 2.65             |
|                                                | SD                   | 1.65                             | 1.67                               | 1.74                            | 1.76             |
|                                                | Minimum              | 0.0                              | 0.0                                | 0.0                             | 0.0              |
|                                                | Median               | 2.00                             | 3.50                               | 3.00                            | 3.00             |
|                                                | Maximum              | 6.0                              | 7.0                                | 6.5                             | 7.0              |

| 06 - Scratchy throat (daily mean)<br>(imputed) |                      | Stratum<br>≤ 12 hours<br>(N=122) | Stratum<br>12 - 24 hours<br>(N=88) | Stratum<br>> 24 hours<br>(N=98) | Total<br>(N=308) |
|------------------------------------------------|----------------------|----------------------------------|------------------------------------|---------------------------------|------------------|
| 4                                              | N <sub>valid</sub>   | 122                              | 88                                 | 98                              | 308              |
|                                                | N <sub>missing</sub> | 0                                | 0                                  | 0                               | 0                |
|                                                | <b>Mean</b>          | 1.66                             | 2.68                               | 2.87                            | 2.34             |
|                                                | SD                   | 1.59                             | 1.66                               | 1.72                            | 1.74             |
|                                                | Minimum              | 0.0                              | 0.0                                | 0.0                             | 0.0              |
|                                                | Median               | 1.50                             | 3.00                               | 3.00                            | 2.25             |
|                                                | Maximum              | 6.0                              | 6.0                                | 6.5                             | 6.5              |
| 5                                              | N <sub>valid</sub>   | 122                              | 88                                 | 98                              | 308              |
|                                                | N <sub>missing</sub> | 0                                | 0                                  | 0                               | 0                |
|                                                | <b>Mean</b>          | 1.23                             | 2.21                               | 2.51                            | 1.92             |
|                                                | SD                   | 1.45                             | 1.59                               | 1.75                            | 1.69             |
|                                                | Minimum              | 0.0                              | 0.0                                | 0.0                             | 0.0              |
|                                                | Median               | 0.75                             | 2.00                               | 2.50                            | 1.50             |
|                                                | Maximum              | 5.0                              | 5.0                                | 6.5                             | 6.5              |
| 6                                              | N <sub>valid</sub>   | 122                              | 88                                 | 98                              | 308              |
|                                                | N <sub>missing</sub> | 0                                | 0                                  | 0                               | 0                |
|                                                | <b>Mean</b>          | 1.00                             | 1.70                               | 2.17                            | 1.57             |
|                                                | SD                   | 1.37                             | 1.51                               | 1.87                            | 1.65             |
|                                                | Minimum              | 0.0                              | 0.0                                | 0.0                             | 0.0              |
|                                                | Median               | 0.50                             | 1.50                               | 2.00                            | 1.00             |
|                                                | Maximum              | 5.0                              | 5.0                                | 6.0                             | 6.0              |
| 7                                              | N <sub>valid</sub>   | 122                              | 88                                 | 98                              | 308              |
|                                                | N <sub>missing</sub> | 0                                | 0                                  | 0                               | 0                |
|                                                | <b>Mean</b>          | 0.80                             | 1.35                               | 1.89                            | 1.30             |
|                                                | SD                   | 1.32                             | 1.41                               | 1.79                            | 1.57             |
|                                                | Minimum              | 0.0                              | 0.0                                | 0.0                             | 0.0              |
|                                                | Median               | 0.00                             | 1.00                               | 1.50                            | 0.50             |
|                                                | Maximum              | 5.5                              | 5.0                                | 6.0                             | 6.0              |
| 8                                              | N <sub>valid</sub>   | 122                              | 88                                 | 98                              | 308              |
|                                                | N <sub>missing</sub> | 0                                | 0                                  | 0                               | 0                |
|                                                | <b>Mean</b>          | 0.58                             | 1.12                               | 1.44                            | 1.01             |
|                                                | SD                   | 1.14                             | 1.44                               | 1.62                            | 1.44             |
|                                                | Minimum              | 0.0                              | 0.0                                | 0.0                             | 0.0              |
|                                                | Median               | 0.00                             | 0.50                               | 1.00                            | 0.00             |
|                                                | Maximum              | 4.5                              | 5.0                                | 5.0                             | 5.0              |
| 9                                              | N <sub>valid</sub>   | 122                              | 88                                 | 98                              | 308              |
|                                                | N <sub>missing</sub> | 0                                | 0                                  | 0                               | 0                |
|                                                | <b>Mean</b>          | 0.41                             | 0.81                               | 1.13                            | 0.75             |
|                                                | SD                   | 0.92                             | 1.32                               | 1.48                            | 1.27             |
|                                                | Minimum              | 0.0                              | 0.0                                | 0.0                             | 0.0              |
|                                                | Median               | 0.00                             | 0.00                               | 0.50                            | 0.00             |
|                                                | Maximum              | 4.0                              | 5.0                                | 5.0                             | 5.0              |
| 10                                             | N <sub>valid</sub>   | 122                              | 88                                 | 98                              | 308              |
|                                                | N <sub>missing</sub> | 0                                | 0                                  | 0                               | 0                |
|                                                | <b>Mean</b>          | 0.35                             | 0.65                               | 0.83                            | 0.59             |
|                                                | SD                   | 0.87                             | 1.26                               | 1.38                            | 1.18             |
|                                                | Minimum              | 0.0                              | 0.0                                | 0.0                             | 0.0              |
|                                                | Median               | 0.00                             | 0.00                               | 0.00                            | 0.00             |
|                                                | Maximum              | 4.3                              | 5.0                                | 5.0                             | 5.0              |

| 06 - Scratchy throat (daily mean)<br>(imputed) |                      | Stratum<br>≤ 12 hours<br>(N=122) | Stratum<br>12 - 24 hours<br>(N=88) | Stratum<br>> 24 hours<br>(N=98) | Total<br>(N=308) |
|------------------------------------------------|----------------------|----------------------------------|------------------------------------|---------------------------------|------------------|
| 11                                             | N <sub>valid</sub>   | 122                              | 88                                 | 98                              | 308              |
|                                                | N <sub>missing</sub> | 0                                | 0                                  | 0                               | 0                |
|                                                | <b>Mean</b>          | 0.30                             | 0.40                               | 0.71                            | 0.46             |
|                                                | SD                   | 0.83                             | 0.87                               | 1.29                            | 1.02             |
|                                                | Minimum              | 0.0                              | 0.0                                | 0.0                             | 0.0              |
|                                                | Median               | 0.00                             | 0.00                               | 0.00                            | 0.00             |
|                                                | Maximum              | 5.0                              | 4.0                                | 5.0                             | 5.0              |
| 12                                             | N <sub>valid</sub>   | 122                              | 88                                 | 98                              | 308              |
|                                                | N <sub>missing</sub> | 0                                | 0                                  | 0                               | 0                |
|                                                | <b>Mean</b>          | 0.18                             | 0.27                               | 0.54                            | 0.32             |
|                                                | SD                   | 0.55                             | 0.71                               | 1.05                            | 0.80             |
|                                                | Minimum              | 0.0                              | 0.0                                | 0.0                             | 0.0              |
|                                                | Median               | 0.00                             | 0.00                               | 0.00                            | 0.00             |
|                                                | Maximum              | 4.0                              | 4.0                                | 4.5                             | 4.5              |
| 13                                             | N <sub>valid</sub>   | 122                              | 88                                 | 98                              | 308              |
|                                                | N <sub>missing</sub> | 0                                | 0                                  | 0                               | 0                |
|                                                | <b>Mean</b>          | 0.14                             | 0.20                               | 0.42                            | 0.25             |
|                                                | SD                   | 0.53                             | 0.68                               | 0.97                            | 0.74             |
|                                                | Minimum              | 0.0                              | 0.0                                | 0.0                             | 0.0              |
|                                                | Median               | 0.00                             | 0.00                               | 0.00                            | 0.00             |
|                                                | Maximum              | 4.0                              | 4.0                                | 4.0                             | 4.0              |
| 14                                             | N <sub>valid</sub>   | 122                              | 88                                 | 98                              | 308              |
|                                                | N <sub>missing</sub> | 0                                | 0                                  | 0                               | 0                |
|                                                | <b>Mean</b>          | 0.11                             | 0.15                               | 0.28                            | 0.17             |
|                                                | SD                   | 0.52                             | 0.52                               | 0.83                            | 0.64             |
|                                                | Minimum              | 0.0                              | 0.0                                | 0.0                             | 0.0              |
|                                                | Median               | 0.00                             | 0.00                               | 0.00                            | 0.00             |
|                                                | Maximum              | 4.5                              | 3.0                                | 4.5                             | 4.5              |
| 15                                             | N <sub>valid</sub>   | 122                              | 88                                 | 98                              | 308              |
|                                                | N <sub>missing</sub> | 0                                | 0                                  | 0                               | 0                |
|                                                | <b>Mean</b>          | 0.07                             | 0.10                               | 0.22                            | 0.13             |
|                                                | SD                   | 0.39                             | 0.43                               | 0.71                            | 0.53             |
|                                                | Minimum              | 0.0                              | 0.0                                | 0.0                             | 0.0              |
|                                                | Median               | 0.00                             | 0.00                               | 0.00                            | 0.00             |
|                                                | Maximum              | 3.5                              | 3.0                                | 3.5                             | 3.5              |
| 16                                             | N <sub>valid</sub>   | 122                              | 88                                 | 98                              | 308              |
|                                                | N <sub>missing</sub> | 0                                | 0                                  | 0                               | 0                |
|                                                | <b>Mean</b>          | 0.07                             | 0.10                               | 0.15                            | 0.10             |
|                                                | SD                   | 0.36                             | 0.43                               | 0.59                            | 0.46             |
|                                                | Minimum              | 0.0                              | 0.0                                | 0.0                             | 0.0              |
|                                                | Median               | 0.00                             | 0.00                               | 0.00                            | 0.00             |
|                                                | Maximum              | 3.5                              | 3.0                                | 3.0                             | 3.5              |
| 17                                             | N <sub>valid</sub>   | 122                              | 88                                 | 98                              | 308              |
|                                                | N <sub>missing</sub> | 0                                | 0                                  | 0                               | 0                |
|                                                | <b>Mean</b>          | 0.07                             | 0.10                               | 0.12                            | 0.09             |
|                                                | SD                   | 0.36                             | 0.43                               | 0.52                            | 0.43             |
|                                                | Minimum              | 0.0                              | 0.0                                | 0.0                             | 0.0              |
|                                                | Median               | 0.00                             | 0.00                               | 0.00                            | 0.00             |
|                                                | Maximum              | 3.5                              | 3.0                                | 3.0                             | 3.5              |

| 07 - Cough (daily mean) (imputed) |                      | Stratum<br>≤ 12 hours<br>(N=122) | Stratum<br>12 - 24 hours<br>(N=88) | Stratum<br>> 24 hours<br>(N=98) | Total<br>(N=308) |
|-----------------------------------|----------------------|----------------------------------|------------------------------------|---------------------------------|------------------|
| <b>Symptom day</b>                |                      |                                  |                                    |                                 |                  |
| <b>1</b>                          | N <sub>valid</sub>   | 122                              | 88                                 | 98                              | 304              |
|                                   | N <sub>missing</sub> | 0                                | 2                                  | 2                               | 4                |
|                                   | <b>Mean</b>          | 2.00                             | 2.10                               | 2.51                            | 2.19             |
|                                   | SD                   | 1.93                             | 1.95                               | 1.72                            | 1.88             |
|                                   | Minimum              | 0.0                              | 0.0                                | 0.0                             | 0.0              |
|                                   | Median               | 1.50                             | 2.00                               | 2.75                            | 2.00             |
|                                   | Maximum              | 7.0                              | 6.5                                | 6.0                             | 7.0              |
| <b>2</b>                          | N <sub>valid</sub>   | 122                              | 88                                 | 98                              | 308              |
|                                   | N <sub>missing</sub> | 0                                | 0                                  | 0                               | 0                |
|                                   | <b>Mean</b>          | 1.86                             | 2.02                               | 2.81                            | 2.21             |
|                                   | SD                   | 1.81                             | 1.93                               | 1.72                            | 1.86             |
|                                   | Minimum              | 0.0                              | 0.0                                | 0.0                             | 0.0              |
|                                   | Median               | 1.50                             | 1.50                               | 3.00                            | 2.00             |
|                                   | Maximum              | 6.0                              | 6.0                                | 6.0                             | 6.0              |
| <b>3</b>                          | N <sub>valid</sub>   | 122                              | 88                                 | 98                              | 308              |
|                                   | N <sub>missing</sub> | 0                                | 0                                  | 0                               | 0                |
|                                   | <b>Mean</b>          | 1.70                             | 2.03                               | 2.98                            | 2.20             |
|                                   | SD                   | 1.81                             | 1.87                               | 1.85                            | 1.92             |
|                                   | Minimum              | 0.0                              | 0.0                                | 0.0                             | 0.0              |
|                                   | Median               | 1.00                             | 2.00                               | 3.00                            | 2.00             |
|                                   | Maximum              | 6.5                              | 5.5                                | 7.0                             | 7.0              |
| <b>4</b>                          | N <sub>valid</sub>   | 122                              | 88                                 | 98                              | 308              |
|                                   | N <sub>missing</sub> | 0                                | 0                                  | 0                               | 0                |
|                                   | <b>Mean</b>          | 1.45                             | 1.91                               | 2.80                            | 2.01             |
|                                   | SD                   | 1.71                             | 1.94                               | 1.79                            | 1.89             |
|                                   | Minimum              | 0.0                              | 0.0                                | 0.0                             | 0.0              |
|                                   | Median               | 1.00                             | 1.50                               | 3.00                            | 1.50             |
|                                   | Maximum              | 7.0                              | 6.0                                | 6.5                             | 7.0              |
| <b>5</b>                          | N <sub>valid</sub>   | 122                              | 88                                 | 98                              | 308              |
|                                   | N <sub>missing</sub> | 0                                | 0                                  | 0                               | 0                |
|                                   | <b>Mean</b>          | 1.24                             | 1.68                               | 2.51                            | 1.77             |
|                                   | SD                   | 1.51                             | 1.84                               | 1.89                            | 1.81             |
|                                   | Minimum              | 0.0                              | 0.0                                | 0.0                             | 0.0              |
|                                   | Median               | 0.50                             | 1.25                               | 2.75                            | 1.00             |
|                                   | Maximum              | 5.0                              | 6.0                                | 7.0                             | 7.0              |
| <b>6</b>                          | N <sub>valid</sub>   | 122                              | 88                                 | 98                              | 308              |
|                                   | N <sub>missing</sub> | 0                                | 0                                  | 0                               | 0                |
|                                   | <b>Mean</b>          | 0.98                             | 1.28                               | 2.12                            | 1.43             |
|                                   | SD                   | 1.36                             | 1.54                               | 1.80                            | 1.63             |
|                                   | Minimum              | 0.0                              | 0.0                                | 0.0                             | 0.0              |
|                                   | Median               | 0.00                             | 0.50                               | 2.00                            | 1.00             |
|                                   | Maximum              | 5.0                              | 5.5                                | 6.0                             | 6.0              |
| <b>7</b>                          | N <sub>valid</sub>   | 122                              | 88                                 | 98                              | 308              |
|                                   | N <sub>missing</sub> | 0                                | 0                                  | 0                               | 0                |
|                                   | <b>Mean</b>          | 0.76                             | 1.11                               | 1.85                            | 1.21             |
|                                   | SD                   | 1.27                             | 1.55                               | 1.78                            | 1.59             |
|                                   | Minimum              | 0.0                              | 0.0                                | 0.0                             | 0.0              |
|                                   | Median               | 0.00                             | 0.00                               | 1.50                            | 0.00             |
|                                   | Maximum              | 5.0                              | 5.0                                | 6.0                             | 6.0              |

| 07 - Cough (daily mean) (imputed) |                      | Stratum<br>≤ 12 hours<br>(N=122) | Stratum<br>12 - 24 hours<br>(N=88) | Stratum<br>> 24 hours<br>(N=98) | Total<br>(N=308) |
|-----------------------------------|----------------------|----------------------------------|------------------------------------|---------------------------------|------------------|
| 8                                 | N <sub>valid</sub>   | 122                              | 88                                 | 98                              | 308              |
|                                   | N <sub>missing</sub> | 0                                | 0                                  | 0                               | 0                |
|                                   | Mean                 | 0.72                             | 0.98                               | 1.51                            | 1.05             |
|                                   | SD                   | 1.34                             | 1.47                               | 1.63                            | 1.51             |
|                                   | Minimum              | 0.0                              | 0.0                                | 0.0                             | 0.0              |
|                                   | Median               | 0.00                             | 0.00                               | 1.00                            | 0.00             |
|                                   | Maximum              | 5.5                              | 5.0                                | 6.0                             | 6.0              |
| 9                                 | N <sub>valid</sub>   | 122                              | 88                                 | 98                              | 308              |
|                                   | N <sub>missing</sub> | 0                                | 0                                  | 0                               | 0                |
|                                   | Mean                 | 0.55                             | 0.82                               | 1.14                            | 0.81             |
|                                   | SD                   | 1.12                             | 1.41                               | 1.51                            | 1.35             |
|                                   | Minimum              | 0.0                              | 0.0                                | 0.0                             | 0.0              |
|                                   | Median               | 0.00                             | 0.00                               | 0.50                            | 0.00             |
|                                   | Maximum              | 5.0                              | 5.0                                | 5.5                             | 5.5              |
| 10                                | N <sub>valid</sub>   | 122                              | 88                                 | 98                              | 308              |
|                                   | N <sub>missing</sub> | 0                                | 0                                  | 0                               | 0                |
|                                   | Mean                 | 0.49                             | 0.69                               | 0.92                            | 0.68             |
|                                   | SD                   | 1.05                             | 1.31                               | 1.42                            | 1.26             |
|                                   | Minimum              | 0.0                              | 0.0                                | 0.0                             | 0.0              |
|                                   | Median               | 0.00                             | 0.00                               | 0.00                            | 0.00             |
|                                   | Maximum              | 4.5                              | 5.0                                | 5.5                             | 5.5              |
| 11                                | N <sub>valid</sub>   | 122                              | 88                                 | 98                              | 308              |
|                                   | N <sub>missing</sub> | 0                                | 0                                  | 0                               | 0                |
|                                   | Mean                 | 0.39                             | 0.58                               | 0.76                            | 0.56             |
|                                   | SD                   | 0.91                             | 1.22                               | 1.41                            | 1.18             |
|                                   | Minimum              | 0.0                              | 0.0                                | 0.0                             | 0.0              |
|                                   | Median               | 0.00                             | 0.00                               | 0.00                            | 0.00             |
|                                   | Maximum              | 5.0                              | 5.0                                | 5.5                             | 5.5              |
| 12                                | N <sub>valid</sub>   | 122                              | 88                                 | 98                              | 308              |
|                                   | N <sub>missing</sub> | 0                                | 0                                  | 0                               | 0                |
|                                   | Mean                 | 0.25                             | 0.47                               | 0.61                            | 0.43             |
|                                   | SD                   | 0.75                             | 1.15                               | 1.26                            | 1.06             |
|                                   | Minimum              | 0.0                              | 0.0                                | 0.0                             | 0.0              |
|                                   | Median               | 0.00                             | 0.00                               | 0.00                            | 0.00             |
|                                   | Maximum              | 5.0                              | 5.0                                | 5.0                             | 5.0              |
| 13                                | N <sub>valid</sub>   | 122                              | 88                                 | 98                              | 308              |
|                                   | N <sub>missing</sub> | 0                                | 0                                  | 0                               | 0                |
|                                   | Mean                 | 0.24                             | 0.40                               | 0.54                            | 0.38             |
|                                   | SD                   | 0.79                             | 1.06                               | 1.21                            | 1.02             |
|                                   | Minimum              | 0.0                              | 0.0                                | 0.0                             | 0.0              |
|                                   | Median               | 0.00                             | 0.00                               | 0.00                            | 0.00             |
|                                   | Maximum              | 5.0                              | 5.0                                | 5.0                             | 5.0              |
| 14                                | N <sub>valid</sub>   | 122                              | 88                                 | 98                              | 308              |
|                                   | N <sub>missing</sub> | 0                                | 0                                  | 0                               | 0                |
|                                   | Mean                 | 0.21                             | 0.31                               | 0.43                            | 0.31             |
|                                   | SD                   | 0.78                             | 0.98                               | 1.13                            | 0.96             |
|                                   | Minimum              | 0.0                              | 0.0                                | 0.0                             | 0.0              |
|                                   | Median               | 0.00                             | 0.00                               | 0.00                            | 0.00             |
|                                   | Maximum              | 5.0                              | 5.0                                | 6.0                             | 6.0              |

| <b>07 - Cough (daily mean) (imputed)</b> |                      | <b>Stratum<br/>&lt;= 12 hours<br/>(N=122)</b> | <b>Stratum<br/>12 - 24 hours<br/>(N=88)</b> | <b>Stratum<br/>&gt; 24 hours<br/>(N=98)</b> | <b>Total<br/>(N=308)</b> |
|------------------------------------------|----------------------|-----------------------------------------------|---------------------------------------------|---------------------------------------------|--------------------------|
| <b>15</b>                                | N <sub>valid</sub>   | 122                                           | 88                                          | 98                                          | 308                      |
|                                          | N <sub>missing</sub> | 0                                             | 0                                           | 0                                           | 0                        |
|                                          | <b>Mean</b>          | 0.18                                          | 0.22                                        | 0.25                                        | 0.21                     |
|                                          | SD                   | 0.67                                          | 0.79                                        | 0.85                                        | 0.76                     |
|                                          | Minimum              | 0.0                                           | 0.0                                         | 0.0                                         | 0.0                      |
|                                          | Median               | 0.00                                          | 0.00                                        | 0.00                                        | 0.00                     |
|                                          | Maximum              | 4.0                                           | 4.5                                         | 5.0                                         | 5.0                      |
| <b>16</b>                                | N <sub>valid</sub>   | 122                                           | 88                                          | 98                                          | 308                      |
|                                          | N <sub>missing</sub> | 0                                             | 0                                           | 0                                           | 0                        |
|                                          | <b>Mean</b>          | 0.18                                          | 0.20                                        | 0.21                                        | 0.19                     |
|                                          | SD                   | 0.66                                          | 0.76                                        | 0.82                                        | 0.74                     |
|                                          | Minimum              | 0.0                                           | 0.0                                         | 0.0                                         | 0.0                      |
|                                          | Median               | 0.00                                          | 0.00                                        | 0.00                                        | 0.00                     |
|                                          | Maximum              | 4.0                                           | 4.5                                         | 5.0                                         | 5.0                      |
| <b>17</b>                                | N <sub>valid</sub>   | 122                                           | 88                                          | 98                                          | 308                      |
|                                          | N <sub>missing</sub> | 0                                             | 0                                           | 0                                           | 0                        |
|                                          | <b>Mean</b>          | 0.18                                          | 0.19                                        | 0.19                                        | 0.19                     |
|                                          | SD                   | 0.66                                          | 0.75                                        | 0.77                                        | 0.72                     |
|                                          | Minimum              | 0.0                                           | 0.0                                         | 0.0                                         | 0.0                      |
|                                          | Median               | 0.00                                          | 0.00                                        | 0.00                                        | 0.00                     |
|                                          | Maximum              | 4.0                                           | 4.5                                         | 4.0                                         | 4.5                      |
