# Supplementary material for: The impact of cineole treatment timing on common cold duration and symptoms: Non-randomized exploratory clinical trial
Source: PubMed Central journal article supplement (PMC10795983; doi:10.1371/journal.pone.0296482), 2024-01-18
Supplement: pone.0296482.s009.pdf [file pone.0296482.s009.pdf]

S9 Table: Symptom severity peak

| <b>Symptom severity<br/>peak</b> | <b>Time to treatment stratum</b> |                                  |                            | <b>Total<br/>(N=308)</b> |
|----------------------------------|----------------------------------|----------------------------------|----------------------------|--------------------------|
|                                  | <b>≤12 h<br/>(N=122)</b>         | <b>&gt;12 to 24 h<br/>(N=88)</b> | <b>&gt;24 h<br/>(N=98)</b> |                          |
| N <sub>valid</sub>               | 122                              | 88                               | 98                         | 308                      |
| N <sub>missing</sub>             | 0                                | 0                                | 0                          | 0                        |
| Mean                             | 29.9                             | 33.0                             | 35.1                       | 32.4                     |
| SD                               | 10.7                             | 9.6                              | 10.4                       | 10.5                     |
| Minimum                          | 4                                | 9                                | 11                         | 4                        |
| Median                           | 30.0                             | 34.0                             | 33.3                       | 32.5                     |
| Maximum                          | 57                               | 54                               | 56                         | 57                       |
