# Supplementary material for: The impact of cineole treatment timing on common cold duration and symptoms: Non-randomized exploratory clinical trial
Source: PubMed Central journal article supplement (PMC10795983; doi:10.1371/journal.pone.0296482), 2024-01-18
Supplement: pone.0296482.s010.pdf [file pone.0296482.s010.pdf]

S10 Table: Time to symptom relief

| <b>Time to symptom relief (Days)</b> | <b>Time to treatment stratum</b> |                              |                        | <b>Total (N=308)</b> |
|--------------------------------------|----------------------------------|------------------------------|------------------------|----------------------|
|                                      | <b>≤12 h (N=122)</b>             | <b>&gt;12 to 24 h (N=88)</b> | <b>&gt;24 h (N=98)</b> |                      |
| N <sub>valid</sub>                   | 121                              | 87                           | 94                     | 302                  |
| N <sub>missing</sub>                 | 1                                | 1                            | 4                      | 6                    |
| Mean                                 | 3.9                              | 4.7                          | 5.2                    | 4.5                  |
| SD                                   | 2.3                              | 2.8                          | 2.9                    | 2.7                  |
| Minimum                              | 1                                | 1                            | 1                      | 1                    |
| Median                               | 3.0                              | 4.0                          | 4.0                    | 4.0                  |
| Maximum                              | 14                               | 14                           | 14                     | 14                   |
