# Supplementary material for: The impact of cineole treatment timing on common cold duration and symptoms: Non-randomized exploratory clinical trial
Source: PubMed Central journal article supplement (PMC10795983; doi:10.1371/journal.pone.0296482), 2024-01-18
Supplement: pone.0296482.s011.pdf [file pone.0296482.s011.pdf]

S11 Table: Investigator assessment of common cold symptoms

| Time to total JSS<br>(Days) | Time to treatment stratum |                       |                 | Total<br>(N=308) |
|-----------------------------|---------------------------|-----------------------|-----------------|------------------|
|                             | ≤12 h<br>(N=122)          | >12 to 24 h<br>(N=88) | >24 h<br>(N=98) |                  |
| <b>Visit 2</b>              |                           |                       |                 |                  |
| N <sub>valid</sub>          | 122                       | 88                    | 98              | 308              |
| N <sub>missing</sub>        | 0                         | 0                     | 0               | 0                |
| Mean                        | 10.2                      | 10.4                  | 11.2            | 10.6             |
| SD                          | 3.2                       | 3.2                   | 3.5             | 3.3              |
| Minimum                     | 4                         | 4                     | 5               | 4                |
| Median                      | 10.0                      | 10.0                  | 10.5            | 10.0             |
| Maximum                     | 21                        | 19                    | 22              | 22               |
| <b>Visit 3</b>              |                           |                       |                 |                  |
| N <sub>valid</sub>          | 119                       | 88                    | 97              | 304              |
| N <sub>missing</sub>        | 3                         | 0                     | 1               | 4                |
| Mean                        | 7.1                       | 7.4                   | 8.8             | 7.7              |
| SD                          | 4.0                       | 3.4                   | 3.6             | 3.8              |
| Minimum                     | 0                         | 2                     | 1               | 0                |
| Median                      | 7.0                       | 7.0                   | 9.0             | 7.5              |
| Maximum                     | 20                        | 16                    | 20              | 20               |
| <b>Visit 4</b>              |                           |                       |                 |                  |
| N <sub>valid</sub>          | 122                       | 88                    | 98              | 308              |
| N <sub>missing</sub>        | 0                         | 0                     | 0               | 0                |
| Mean                        | 0.3                       | 0.3                   | 0.3             | 0.3              |
| SD                          | 1.6                       | 1.0                   | 1.3             | 1.4              |
| Minimum                     | 0                         | 0                     | 0               | 0                |
| Median                      | 0.0                       | 0.0                   | 0.0             | 0.0              |
| Maximum                     | 15                        | 5                     | 9               | 15               |

JSS: Jackson Symptom Score
