# Supplementary material for: The impact of cineole treatment timing on common cold duration and symptoms: Non-randomized exploratory clinical trial
Source: PubMed Central journal article supplement (PMC10795983; doi:10.1371/journal.pone.0296482), 2024-01-18
Supplement: pone.0296482.s012.pdf [file pone.0296482.s012.pdf]

S12 Table: Days of bed rest due to common cold

| <b>Days of bed rest<br/>due to common<br/>cold</b> | <b>Time to treatment stratum</b> |                                  |                            | <b>Total<br/>(N=308)</b> |
|----------------------------------------------------|----------------------------------|----------------------------------|----------------------------|--------------------------|
|                                                    | <b>≤12 h<br/>(N=122)</b>         | <b>&gt;12 to 24 h<br/>(N=88)</b> | <b>&gt;24 h<br/>(N=98)</b> |                          |
| N <sub>valid</sub>                                 | 122                              | 88                               | 98                         | 308                      |
| N <sub>missing</sub>                               | 0                                | 0                                | 0                          | 0                        |
| Mean                                               | 0.6                              | 0.6                              | 0.6                        | 0.6                      |
| SD                                                 | 1.5                              | 1.4                              | 1.2                        | 1.4                      |
| Minimum                                            | 0                                | 0                                | 0                          | 0                        |
| Median                                             | 0.0                              | 0.0                              | 0.0                        | 0.0                      |
| Maximum                                            | 12                               | 8                                | 5                          | 12                       |
