# Supplementary material for: The impact of cineole treatment timing on common cold duration and symptoms: Non-randomized exploratory clinical trial
Source: PubMed Central journal article supplement (PMC10795983; doi:10.1371/journal.pone.0296482), 2024-01-18
Supplement: pone.0296482.s013.pdf [file pone.0296482.s013.pdf]

S13 Table: Summary of reported adverse events

| Category<br>Subcategory      | AEs with suspected causal<br>relationship to IMP<br>(N=329) |                | All AEs<br>(N=329) |                 |
|------------------------------|-------------------------------------------------------------|----------------|--------------------|-----------------|
|                              | AEs <sup>1</sup>                                            | n patients (%) | AEs <sup>2</sup>   | n patients (%)  |
| <b>Overall</b>               |                                                             |                | <b>25</b>          | <b>22 (6.7)</b> |
| Related                      | 17                                                          | 14 (4.3)       | 17                 | 14 (4.3)        |
| Not related                  |                                                             |                | 8                  | 8 (2.4)         |
| <b>Intensity</b>             |                                                             |                |                    |                 |
| Mild                         | 11                                                          | 10 (3.0)       | 17                 | 16 (4.9)        |
| Moderate                     | 6                                                           | 4 (1.2)        | 7                  | 5 (1.5)         |
| Severe                       | 0                                                           | 0 (0.0)        | 1                  | 1 (0.3)         |
| <b>Action taken</b>          |                                                             |                |                    |                 |
| IMP treatment not changed    | 12                                                          | 10 (3.0)       | 13                 | 11 (3.3)        |
| Concomitant medication given | 0                                                           | 0 (0.0)        | 6                  | 6 (1.8)         |
| Discontinued prematurely     | 1                                                           | 1 (0.3)        | 3                  | 3 (0.9)         |
| Reduced IMP dose             | 3                                                           | 3 (0.9)        | 3                  | 3 (0.9)         |
| Interrupted IMP              | 1                                                           | 1 (0.3)        | 1                  | 1 (0.3)         |
| <b>Outcome</b>               |                                                             |                |                    |                 |
| Resolved                     | 17                                                          | 14 (4.3)       | 23                 | 20 (6.1)        |
| Ongoing                      | 0                                                           | 0 (0.0)        | 2                  | 2 (0.6)         |
| <b>SAE</b>                   | 0                                                           | 0 (0.0)        | 0                  | 0 (0.0)         |

<sup>1</sup>One subject interrupted treatment for 2 days due to diarrhoea (moderate), one subject discontinued prematurely due to vomiting (moderate). <sup>2</sup>Early discontinuation of two subjects due to Tonsillitis bacterial (severe) and diverticulitis (moderate). AE: adverse event; IMP: investigational medicinal product; SAE: serious adverse event.
